# Supplementary material for: Looking at platinum carbonyl nanoclusters as superatoms
Source: Royal Society of Chemistry journal article supplement (doi:10.1039/d1nr08216g), 2022-01-01
Supplement: d1nr08216g2.pdf [file d1nr08216g2.pdf]

### Looking at platinum carbonyl nanoclusters as *superatoms*

Jianyu Wei,<sup>a,b</sup> Rémi Marchal,<sup>a</sup> Didier Astruc,<sup>b</sup> Samia Kahlal\*<sup>a</sup> Jean-François Halet,<sup>\*a,c</sup> and Jean-Yves Saillard\*<sup>a</sup>

<sup>a</sup> Univ Rennes, CNRS, Institut des Sciences Chimiques de Rennes (ISCR) – UMR 6226, F-35000 Rennes, France. E-mail: [samia.kahlal@univ-rennes1.fr](mailto:samia.kahlal@univ-rennes1.fr), [saillard@univ-rennes1.fr](mailto:saillard@univ-rennes1.fr)

<sup>b</sup> ISM, UMR CNRS 5255, University of Bordeaux, 351 Cours de la Libération, F-33405 Talence Cedex, France.

<sup>c</sup> CNRS – Saint-Gobain – NIMS, IRL 3629, Laboratory for Innovative Key Materials and Structures (LINK), National Institute for Materials Science (NIMS), Tsukuba, 305-0044, Japan. E-mail: [jean-francois.halet@univ-rennes1.fr](mailto:jean-francois.halet@univ-rennes1.fr)

*Dedicated to the memory of Professor Larry F. Dahl, a pioneer and an immense contributor to ligated cluster chemistry*

## Table of Contents

|                                                                                                                                                                                                                                                                                                     |    |
|-----------------------------------------------------------------------------------------------------------------------------------------------------------------------------------------------------------------------------------------------------------------------------------------------------|----|
| Fig. S1 Metallic kernel structure of the icosahedral 8-electron <i>superatom</i> models. Light-grey, pink and golden-yellow spheres are outer Pt, central Pt and Au atoms, respectively. ....                                                                                                       | 5  |
| Fig. S2 Plots of the <i>superatomic</i> orbitals of $[\text{Pt}_{13}(\text{CO})_{12}]^{8-}$ ( $I_h$ ) with the surface isovalue of $\pm 0.02$ ( $\text{e}/\text{bohr}^3$ ) <sup>1/2</sup> . ....                                                                                                    | 6  |
| Fig. S3 Kohn-Sham orbital diagram of $\text{Pt}_{13}\text{Au}_4(\mu_2\text{-CO})_2(\text{CO})_{16}$ . The 5d block contains all Pt and Au contributions. ....                                                                                                                                       | 7  |
| Fig. S4 Kohn-Sham orbital diagram of $\text{Pt}_{17}(\mu_2\text{-CO})_4(\text{CO})_{16}$ . The 5d block contains all Pt contributions. ....                                                                                                                                                         | 8  |
| Fig. S5 Metallic kernel structure of $[\text{Pt}_{13}(\text{CO})_{12}(\mu\text{-CO})_5]^{2-}$ , $[\text{Pt}_{14}(\text{CO})_{12}(\mu\text{-CO})_6]^{4-}$ and $[\text{Pt}_{15}(\text{CO})_{11}(\mu\text{-CO})_8]^{4-}$ . Light-grey and pink spheres are outer Pt and central Pt, respectively. .... | 9  |
| Fig. S6 Plots of the <i>superatomic</i> orbitals of $[\text{Pt}_{13}(\text{CO})_{12}(\mu\text{-CO})_5]^{2-}$ ( $D_{5h}$ ) with the surface isovalue of $\pm 0.02$ ( $\text{e}/\text{bohr}^3$ ) <sup>1/2</sup> . ....                                                                                | 10 |
| Fig. S7 The occupied 6s(Pt) combinations of $[\text{Pt}_{14}(\mu\text{-CO})_6(\text{CO})_{12}]^{4-}$ and $[\text{Pt}_{15}(\mu\text{-CO})_8(\text{CO})_{11}]^{4-}$ . ....                                                                                                                            | 11 |
| Fig. S8 Metallic kernel structure of the clusters that can be viewed as assemblies of individual superatoms. Light-grey, pink and green spheres are outer Pt, central Pt and the Pt that shared between two or three <i>superatoms</i> , respectively. ....                                         | 12 |
| Fig. S9 Plots of the <i>supermolecular</i> orbitals of $[\text{Pt}_{19}(\text{CO})_{17}]^{10-}$ ( $D_{5h}$ ) with the surface isovalue of $\pm 0.02$ ( $\text{e}/\text{bohr}^3$ ) <sup>1/2</sup> . ....                                                                                             | 13 |
| Fig. S10 Spin density plots of $[\text{Pt}_{19}(\text{CO})_{17}\{\text{Cd}_5(\mu\text{-Br})_5\text{Br}_3(\text{Me}_2\text{CO})_2\}\{\text{Cd}_5(\mu\text{-Br})_5\text{Br}(\text{Me}_2\text{CO})_4\}]^{2-}$ (A) and $[\text{Pt}_{19}\text{CO}_{17}]^{8-}$ ( $D_{5h}$ ) (B). ....                     | 14 |
| Fig. S11 Kohn-Sham orbital diagram of the fully decorated $[\text{Pt}_{19}(\text{CO})_{17}\{\text{Cd}_5(\mu\text{-Br})_5\text{Br}_3(\text{Me}_2\text{CO})_2\}\{\text{Cd}_5(\mu\text{-Br})_5\text{Br}(\text{Me}_2\text{CO})_4\}]^{4-}$ . ....                                                        | 15 |
| Fig. S12 Kohn-Sham orbital diagram of $[\text{Pt}_{26}(\mu_2\text{-CO})_9(\text{CO})_{23}]^{2-}$ . The <i>supermolecular</i> orbitals plotted on the right side are reminiscent of the valence orbitals of the hypothetical triangular isomer of $\text{O}_3$ . ....                                | 16 |

|                                                                                                                                                                                                                                                                       |    |
|-----------------------------------------------------------------------------------------------------------------------------------------------------------------------------------------------------------------------------------------------------------------------|----|
| Fig. S13 Metallic kernel structure of the linear assemblies of individual icosahedral superatoms (hypothetical models). Light-grey, pink and green spheres are outer Pt, central Pt and the Pt that shared between two or three <i>superatoms</i> , respectively..... | 17 |
| Fig. S14 Kohn-Sham orbital diagram of the hypothetical $\text{Pt}_{25}(\text{CO})_{22}]^{12-}$ .....                                                                                                                                                                  | 18 |
| Fig. S15 Kohn-Sham orbital diagram of the hypothetical $[\text{Pt}_{23}(\text{CO})_{20}]^{12-}$ .....                                                                                                                                                                 | 19 |
| Fig. S16 Kohn-Sham orbital diagram of the hypothetical $[\text{Pt}_{23}(\text{CO})_{21}]^{10-}$ .....                                                                                                                                                                 | 20 |
| Fig. S17 Metallic kernel structure of various clusters with non-spherical 3D structure. Light-grey, pink and golden-yellow spheres are outer Pt, inner Pt that belonging to the encapsulated polyhedron and Au atoms, respectively.....                               | 21 |
| Fig. S18 Kohn-Sham orbital diagram of the pseudo-spherical $[\text{Pt}_{38}(\mu_2\text{-CO})_{12}(\text{CO})_{32}]^{2-}$ .....                                                                                                                                        | 22 |
| Fig. S19 Kohn-Sham MO diagram of $[\text{Pt}_{36}(\mu\text{-CO})_{18}(\text{CO})_{26}]^{2-}$ . The <i>supermolecular</i> orbitals, plotted on the right side, are consistent with the $1\text{S}^2 1\text{P}^8 1\text{D}^{10}$ configuration. ....                    | 23 |
| Fig. S20 Qualitative frontier MO interaction diagram between the $\text{Ptn}(\text{CO})_n$ and $(\mu\text{-CO})_m$ fragments in a neutral $[\text{Ptn}(\text{CO})_n(\mu\text{-CO})_m]$ nanocluster.....                                                               | 24 |
| Table S1. Relevant computed data for $[\text{Pt}_{13}(\text{CO})_{12}]^{8-}$ .....                                                                                                                                                                                    | 25 |
| Table S2. Relevant computed data for $[\text{Pt}_{13}(\text{CO})_{12}\{\text{Cd}_5(\mu\text{-Br})_5\text{Br}_2(\text{dmf})_3\}_2]^{2-}$ .....                                                                                                                         | 26 |
| Table S3. Relevant computed data for the $\text{Pt}_{13}(\text{Au}_2\text{L}_2)_2(\mu\text{-CO})_2(\text{CO})_8(\text{L})_4$ ( $\text{L} = \text{CO}, \text{PH}_3$ ) clusters. ....                                                                                   | 27 |
| Table S4. Relevant computed data for the $\text{Pt}_{13}(\text{Pt}_2(\mu\text{-CO})(\text{L})_2)_2(\mu\text{-CO})_2(\text{CO})_8(\text{L})_4$ ( $\text{L} = \text{CO}, \text{PH}_3$ ) clusters. ....                                                                  | 28 |
| Table S5. Relevant computed data for the $[\text{Pt}_{14}(\mu\text{-CO})_6(\text{CO})_{12}]^{4-}$ and $[\text{Pt}_{15}(\mu\text{-CO})_8(\text{CO})_{11}]^{4-}$ clusters. ....                                                                                         | 28 |
| Table S6. Relevant computed data for the $[\text{Pt}_{19}(\text{CO})_{17}]^{8-/10-}$ clusters.....                                                                                                                                                                    | 29 |
| Table S7. Computed data for $[\text{Pt}_{19}(\text{CO})_{17}\{\text{Cd}_5(\mu\text{-Br})_5\text{Br}_3(\text{Me}_2\text{CO})_2\}\{\text{Cd}_5(\mu\text{-Br})_5\text{Br}(\text{Me}_2\text{CO})_4\}]^{x-}$ ( $x = 2, 4$ ).....                                           | 30 |
| Table S8. Relevant computed data for $[\text{Pt}_{19}(\mu\text{-CO})_{10}(\text{CO})_{12}]^{4-}$ .....                                                                                                                                                                | 31 |
| Table S9. Relevant computed data for $[\text{Pt}_{26}(\mu\text{-CO})_9(\text{CO})_{23}]^{2-}$ . ....                                                                                                                                                                  | 32 |
| Table S10. Relevant computed data for $[\text{Pt}_{23}(\mu\text{-CO})_{13}(\text{CO})_{14}]^{2-}$ . ....                                                                                                                                                              | 33 |

|                                                                                                                                                    |    |
|----------------------------------------------------------------------------------------------------------------------------------------------------|----|
| Table S11. Relevant computed data for the hypothetical cluster $[\text{Pt}_{25}(\text{CO})_{22}]^{12-}$ .                                          | 33 |
| Table S12. Relevant computed data for the hypothetical cluster $[\text{Pt}_{23}\text{CO}_{20}]^{12-}$ .                                            | 34 |
| Table S13. Relevant computed data for the hypothetical cluster $[\text{Pt}_{23}\text{CO}_{21}]^{10-}$ .                                            | 34 |
| Table S14. Relevant computed data for $[\text{Pt}_{38}(\mu\text{-CO})_{12}(\text{CO})_{32}]^{2-}$ .                                                | 34 |
| Table S15. Relevant computed data for $[\text{Pt}_{36}(\mu\text{-CO})_{18}(\text{CO})_{26}]^{2-}$ .                                                | 35 |
| Table S16. Relevant computed data for $[\text{Pt}_{19}(\mu_3\text{-CO})_3(\mu\text{-CO})_3(\text{CO})_{18}(\mu_4\text{-AuPH}_3)_3]^-$ .            | 36 |
| Table S17. Relevant computed data for $[\text{Pt}_{19}(\mu_3\text{-CO})(\mu\text{-CO})_5(\text{CO})_{18}\{\mu_4\text{-Au}_2(\text{PH}_3)_2\}_2]$ . | 36 |
| Table S18. Relevant computed data for $[\text{Pt}_{40}(\mu\text{-CO})_{16}(\text{CO})_{24}]^{6-}$ .                                                | 37 |
| Table S19. Relevant computed data for $[\text{Pt}_{24}(\mu\text{-CO})_8(\text{CO})_{22}]^{2-}$ .                                                   | 37 |
| Table S20. Relevant computed data for $[\text{Pt}_{33}(\mu\text{-CO})_{10}(\text{CO})_{28}]^{2-}$ .                                                | 38 |
| References                                                                                                                                         | 38 |

| Computed model                                                 | Metallic kernel structure                                                            |
|----------------------------------------------------------------|--------------------------------------------------------------------------------------|
| $[\text{Pt}_{13}(\text{CO})_{12}]^{8-}$                        | 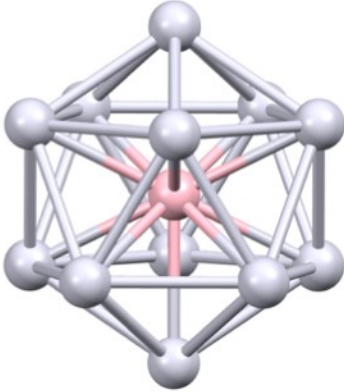   |
| $[\text{Pt}_{13}\text{Au}_4(\mu\text{-CO})_2(\text{CO})_{16}]$ |   |
| $[\text{Pt}_{17}(\mu\text{-CO})_4(\text{CO})_{16}]$            |  |

**Fig. S1** Metallic kernel structure of the icosahedral 8-electron *superatom* models. Light-grey, pink and golden-yellow spheres are outer Pt, central Pt and Au atoms, respectively.

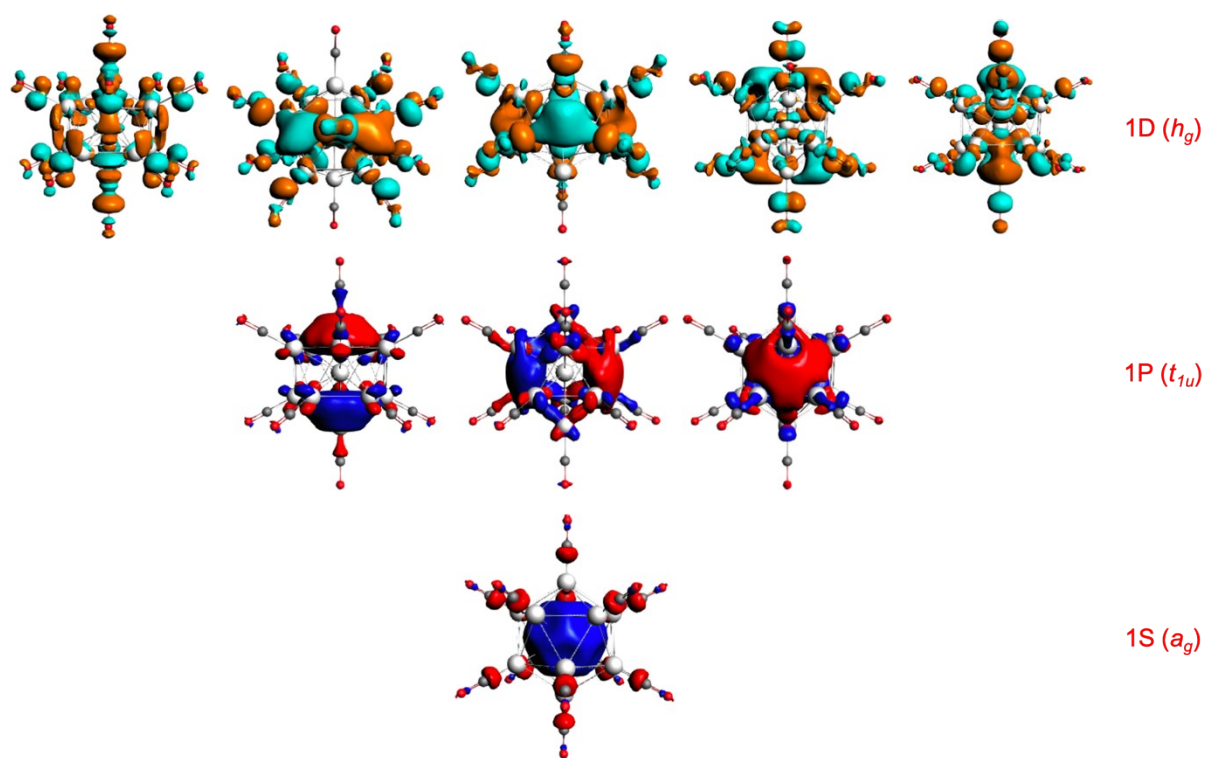

**Fig. S2** Plots of the *superatomic* orbitals of  $[\text{Pt}_{13}(\text{CO})_{12}]^{8-}$  ( $I_h$ ) with the surface isovalue of  $\pm 0.02$  ( $e/\text{bohr}^3$ )<sup>1/2</sup>.

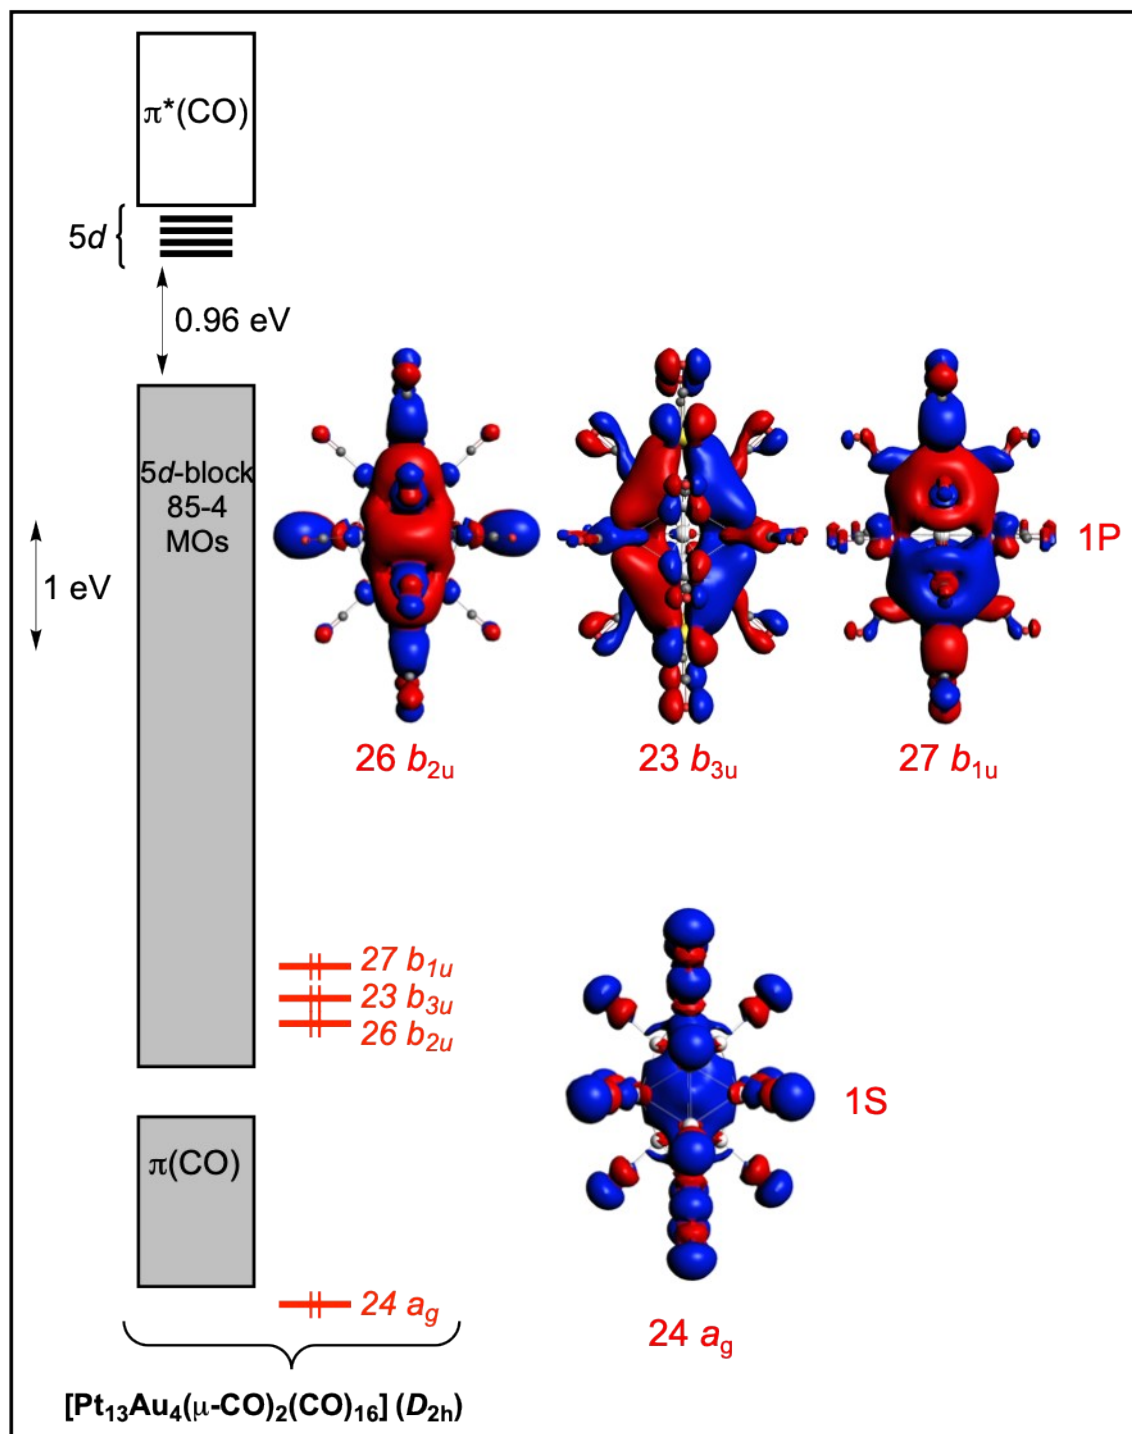

**Fig. S3** Kohn-Sham orbital diagram of  $\text{Pt}_{13}\text{Au}_4(\mu_2\text{-CO})_2(\text{CO})_{16}$ . The 5d block contains all Pt and Au contributions. The surface isovalue of the inserted plots of *superatomic* orbitals is  $\pm 0.01 (\text{e}/\text{bohr}^3)^{1/2}$ .

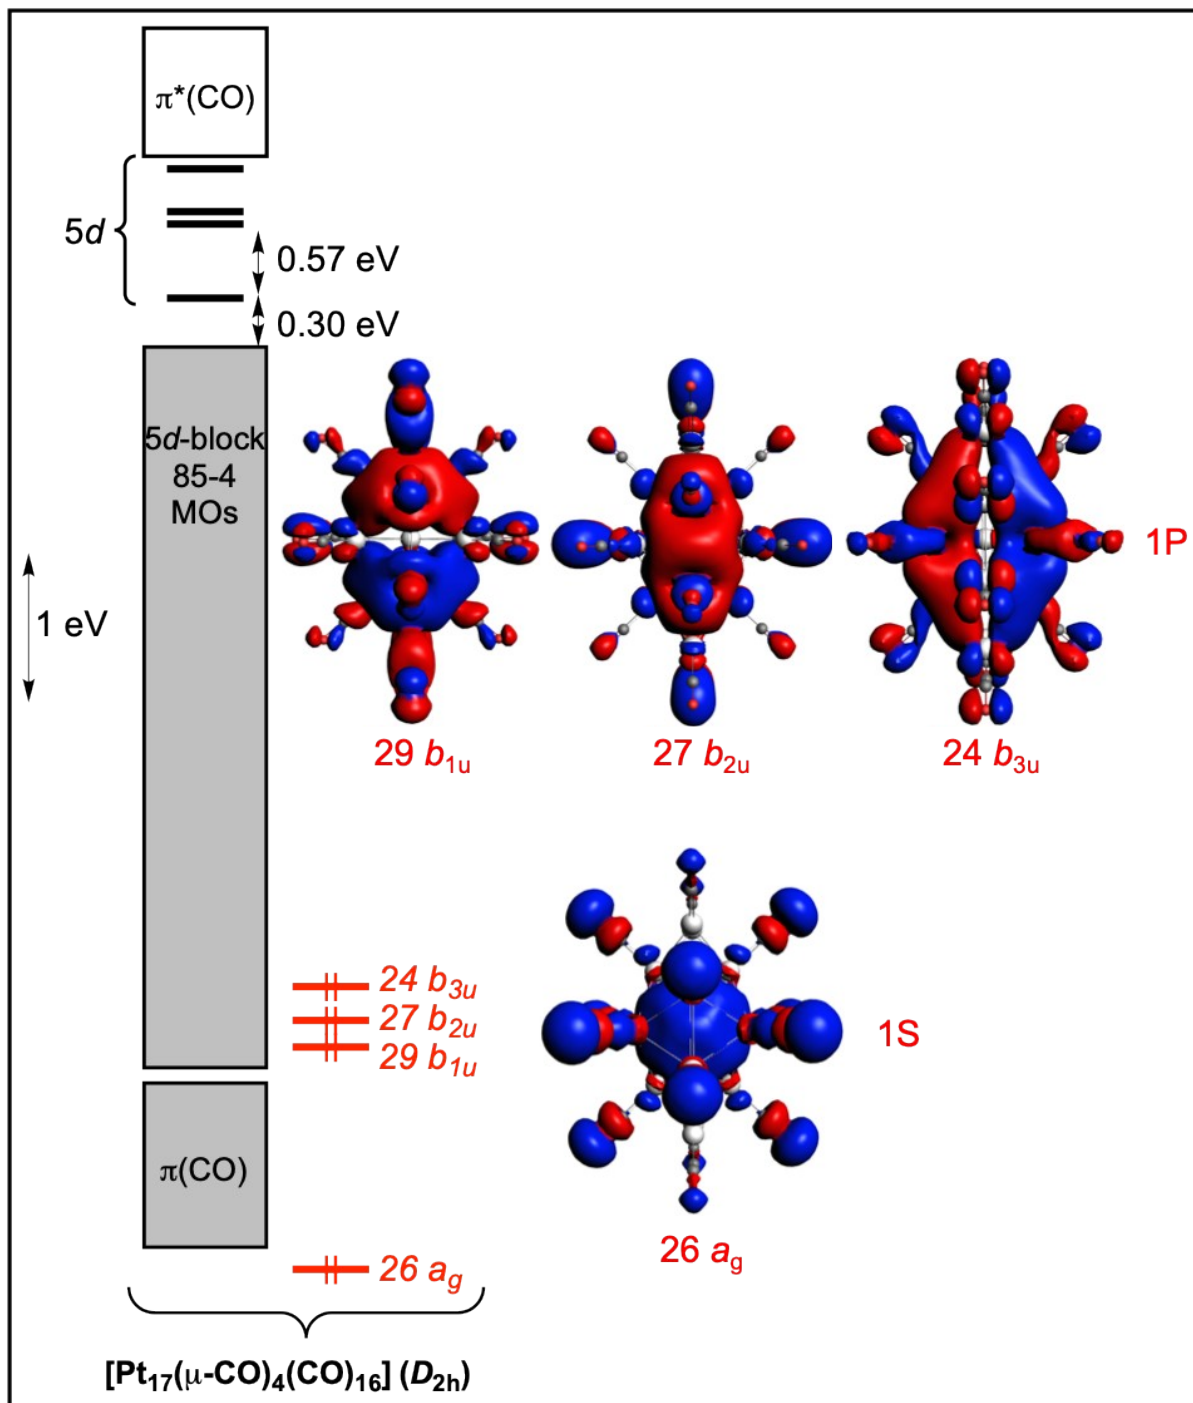

**Fig. S4** Kohn-Sham orbital diagram of Pt<sub>17</sub>( $\mu_2$ -CO)<sub>4</sub>(CO)<sub>16</sub>. The 5d block contains all Pt contributions. The surface isovalue of the inserted plots of *superatomic* orbitals is  $\pm 0.01$  (e/bohr<sup>3</sup>)<sup>1/2</sup>.



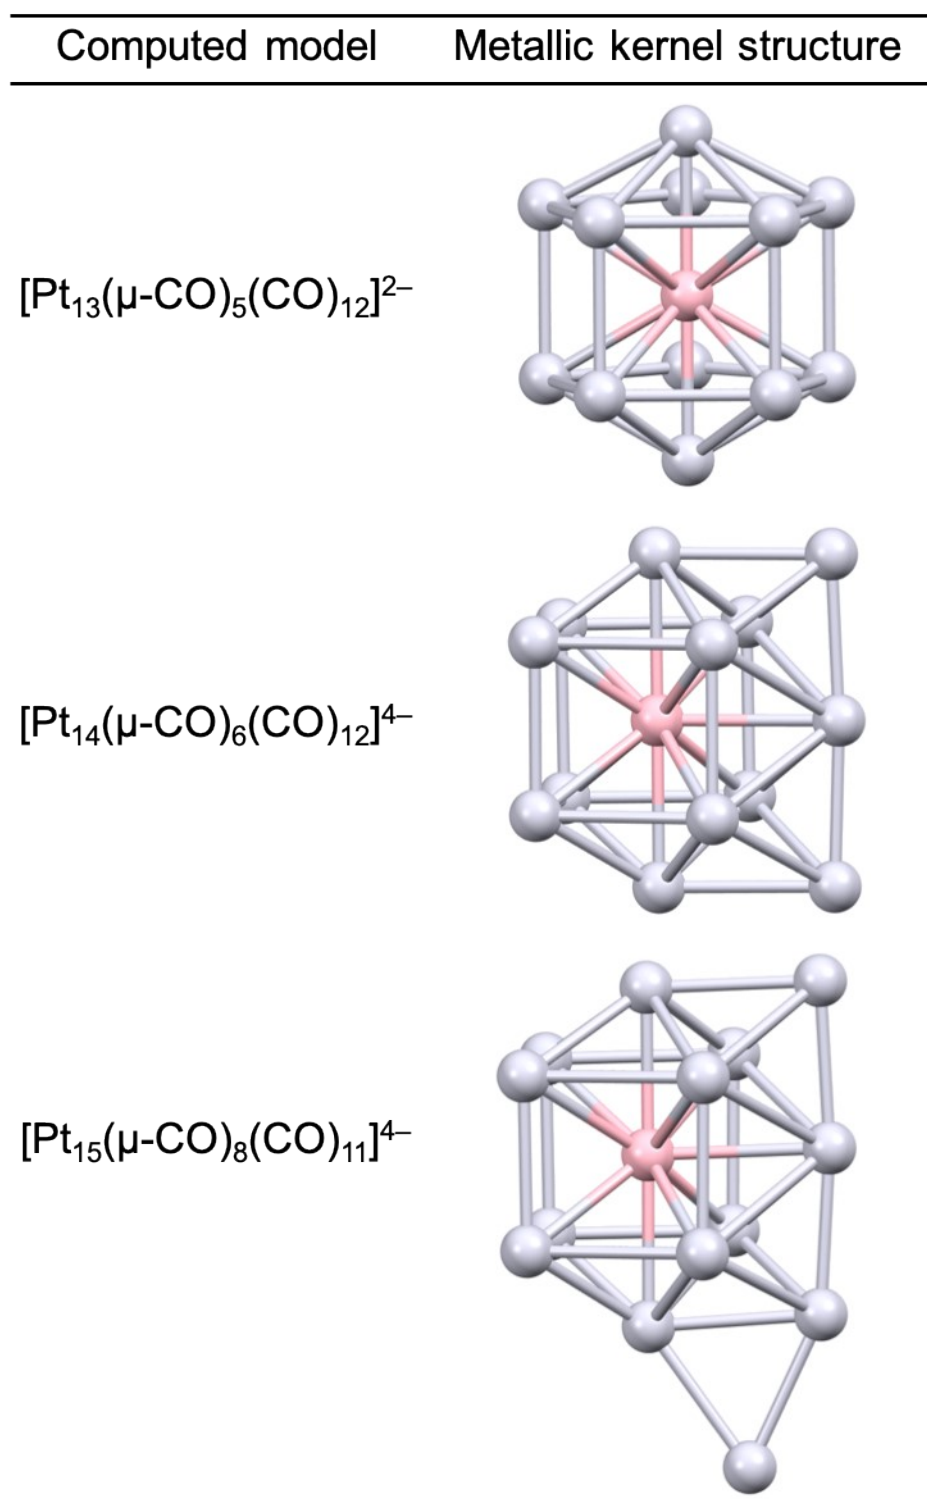

**Fig. S5** Metallic kernel structure of  $[\text{Pt}_{13}(\text{CO})_{12}(\mu\text{-CO})_5]^{2-}$ ,  $[\text{Pt}_{14}(\text{CO})_{12}(\mu\text{-CO})_6]^{4-}$  and  $[\text{Pt}_{15}(\text{CO})_{11}(\mu\text{-CO})_8]^{4-}$ . Light-grey and pink spheres are outer Pt and central Pt, respectively.

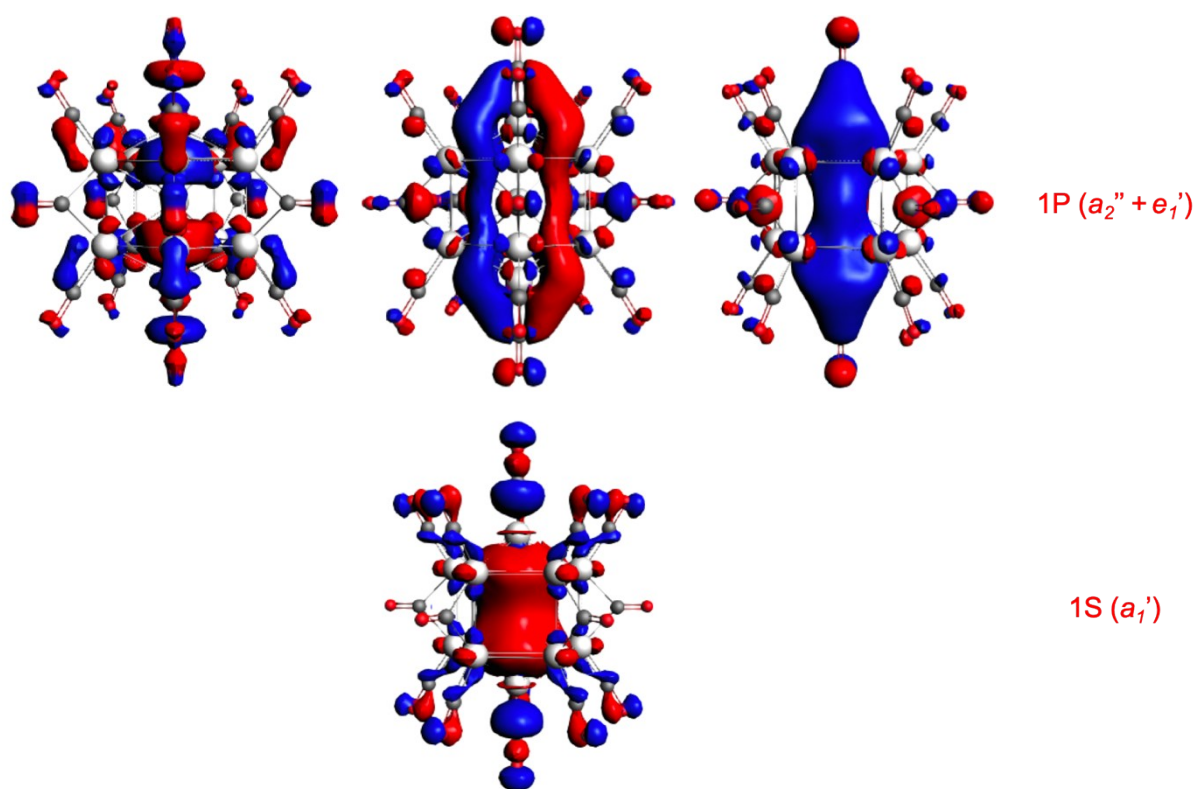

**Fig. S6** Plots of the *superatomic* orbitals of  $[\text{Pt}_{13}(\text{CO})_{12}(\mu\text{-CO})_5]^{2-}$  ( $D_{5h}$ ) with the surface isovalue of  $\pm 0.02$  ( $e/\text{bohr}^3$ )<sup>1/2</sup>.

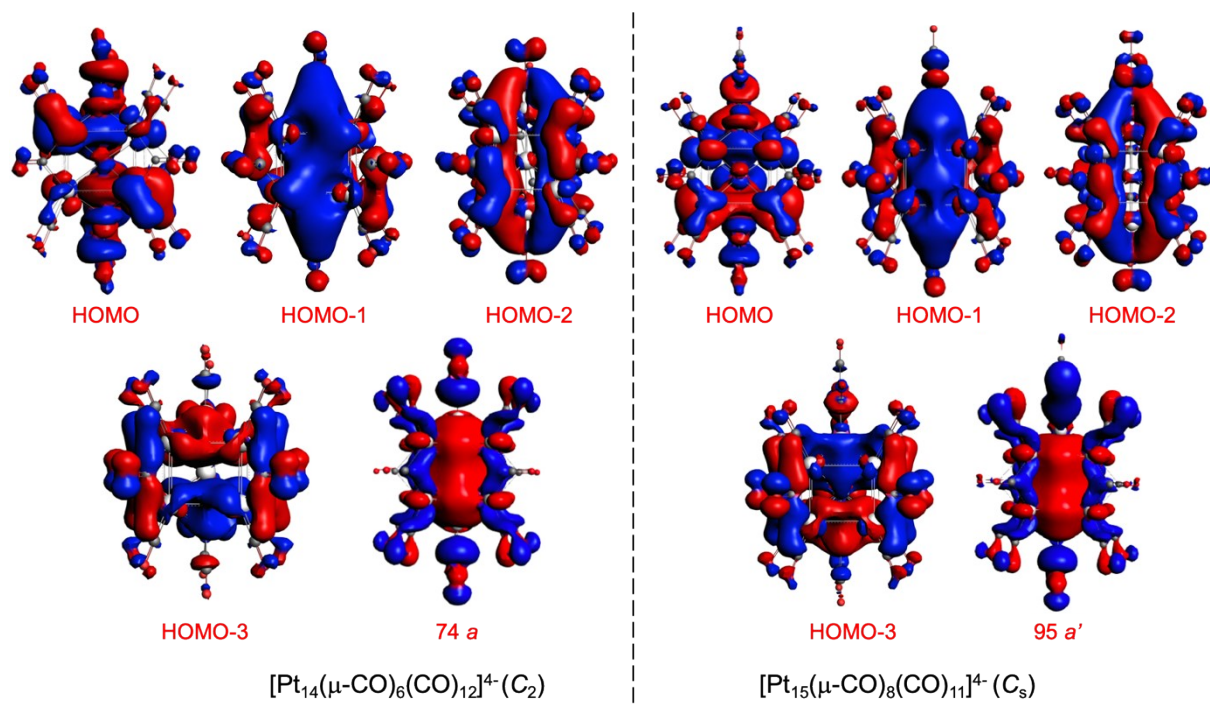

**Fig. S7** The occupied 6s(Pt) combinations of  $[\text{Pt}_{14}(\mu\text{-CO})_6(\text{CO})_{12}]^{4-}$  and  $[\text{Pt}_{15}(\mu\text{-CO})_8(\text{CO})_{11}]^{4-}$ . The surface isovalue of the inserted plots of orbitals is  $\pm 0.01$  ( $\text{e}/\text{bohr}^3$ )<sup>1/2</sup>.

| Computed model                                              | Metallic kernel structure                                                            |
|-------------------------------------------------------------|--------------------------------------------------------------------------------------|
| $[\text{Pt}_{19}(\text{CO})_{17}]^{8-/10-}$                 | 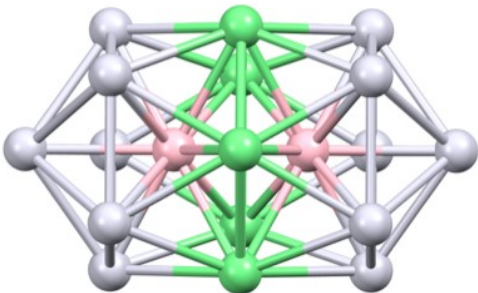   |
| $[\text{Pt}_{19}(\mu\text{-CO})_{10}(\text{CO})_{12}]^{4-}$ |    |
| $[\text{Pt}_{26}(\mu\text{-CO})_9(\text{CO})_{23}]^{2-}$    |   |
| $[\text{Pt}_{23}(\mu\text{-CO})_{13}(\text{CO})_{14}]^{2-}$ |  |

Fig. S8 Metallic kernel structure of the clusters that can be viewed as assemblies of individual superatoms. Light-grey, pink and green spheres are outer Pt, central Pt and the Pt shared between two or three *superatoms*, respectively.

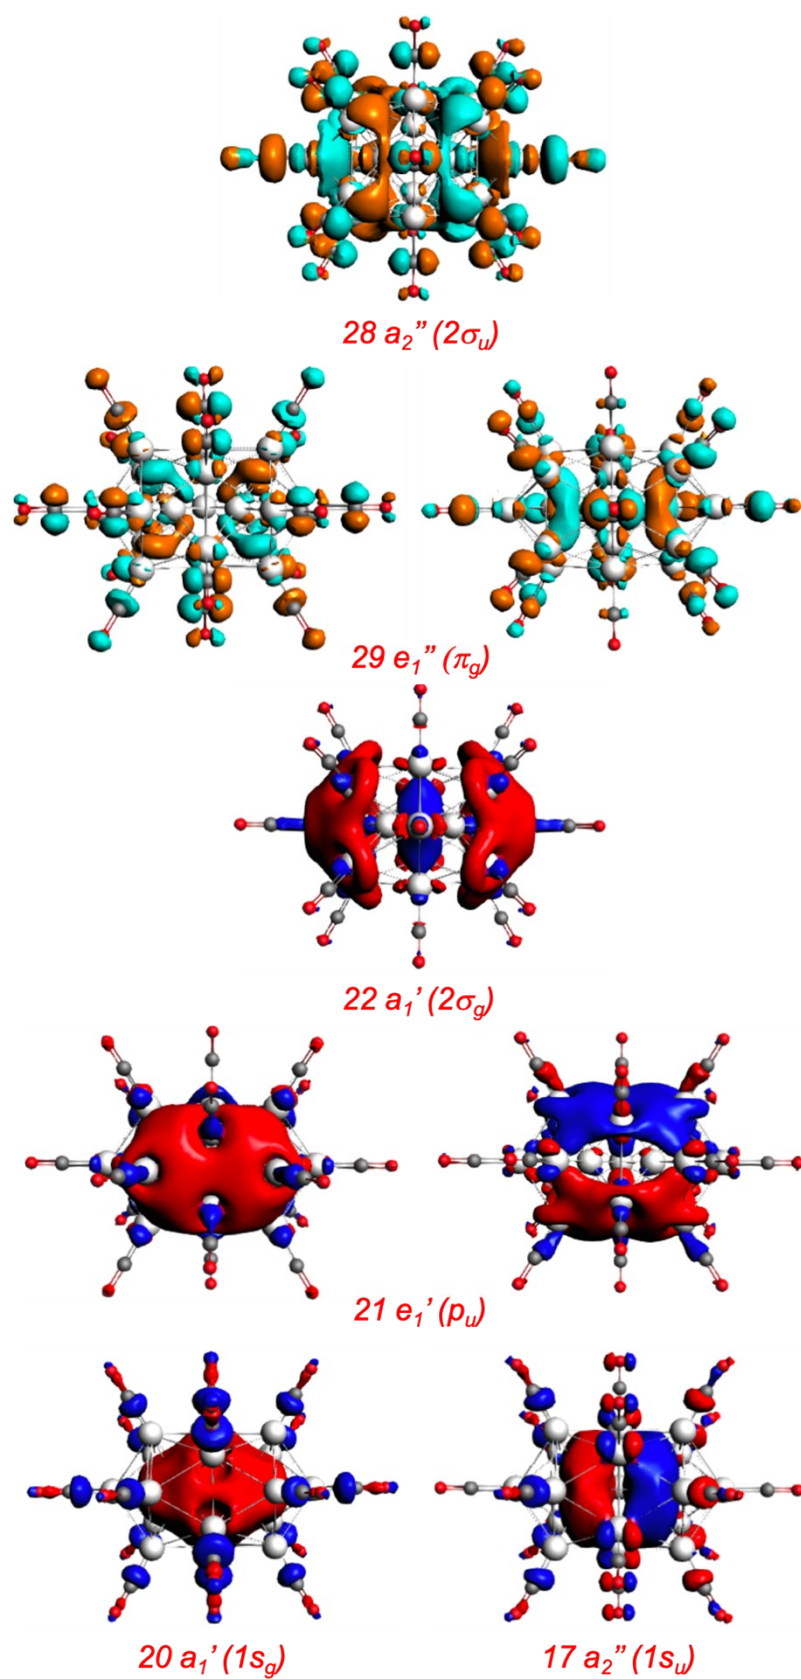

**Fig. S9** Plots of the *supermolecular* orbitals of  $[\text{Pt}_{19}(\text{CO})_{17}]^{10-}$  ( $D_{5h}$ ) with the surface isovalue of  $\pm 0.02$  ( $\text{e}/\text{bohr}^3$ )<sup>1/2</sup>.

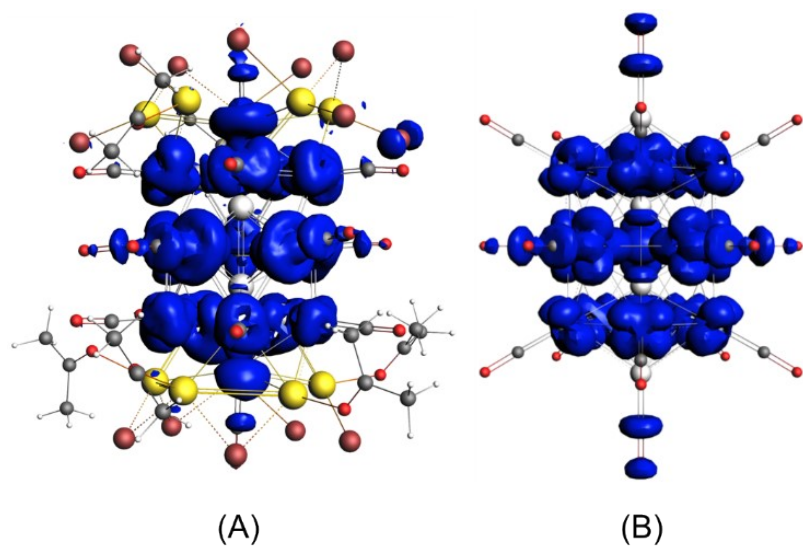

**Fig. S10** Spin density plots of  $[\text{Pt}_{19}(\text{CO})_{17}\{\text{Cd}_5(\mu\text{-Br})_5\text{Br}_3(\text{Me}_2\text{CO})_2\}\{\text{Cd}_5(\mu\text{-Br})_5\text{Br}(\text{Me}_2\text{CO})_4\}]^{2-}$  (A) and  $[\text{Pt}_{19}\text{CO}_{17}]^{8-}$  ( $D_{5h}$ ) (B).



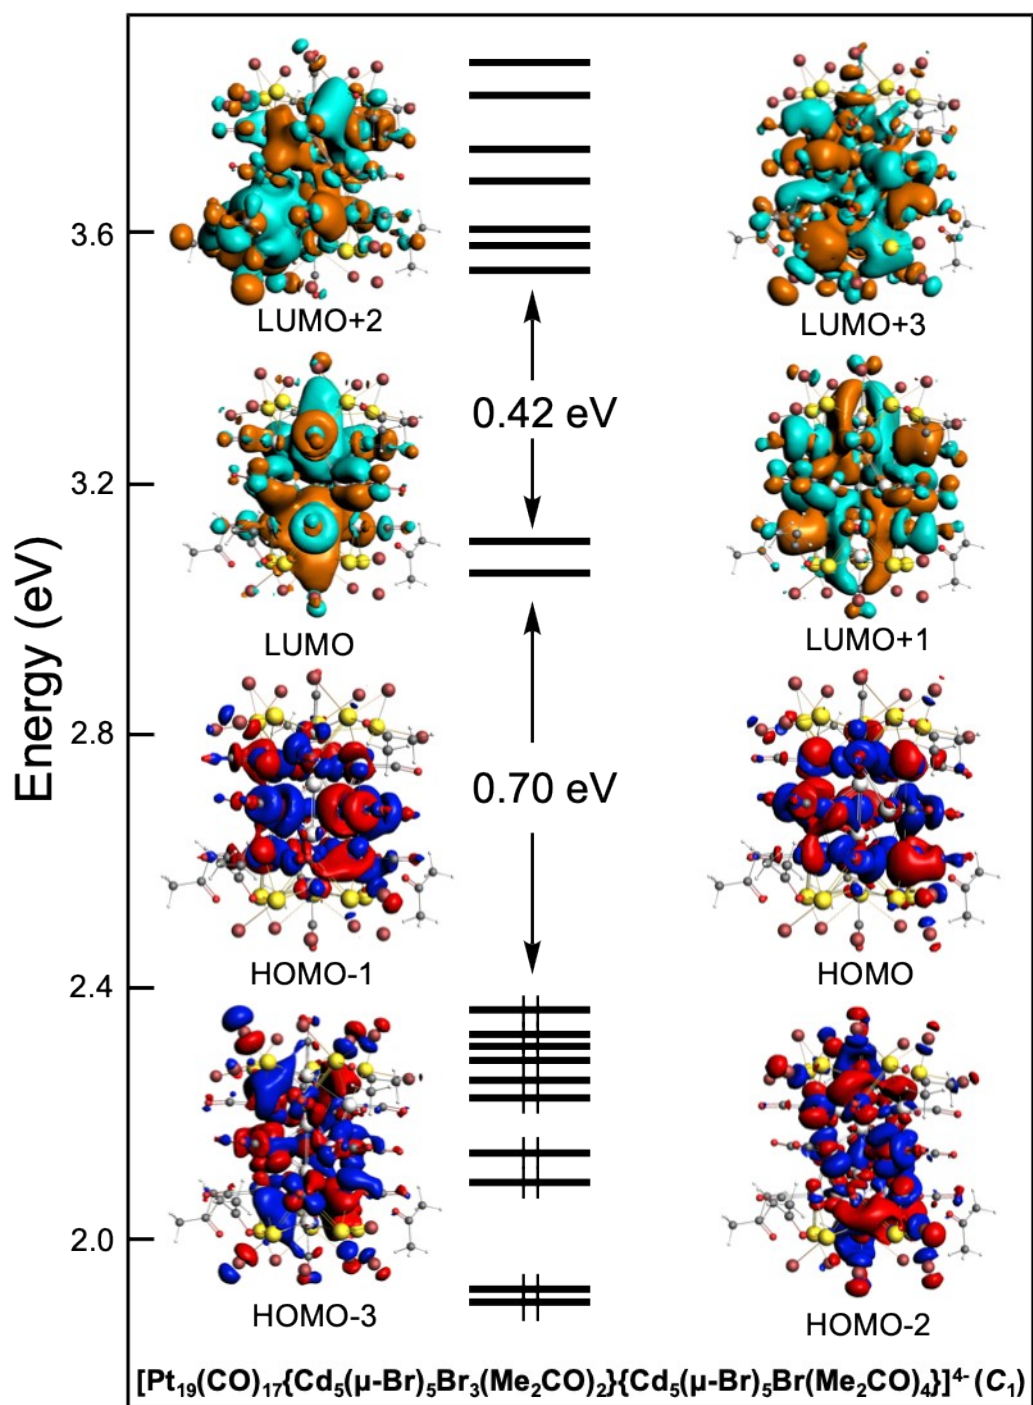

**Fig. S11** Kohn-Sham frontier molecular orbital diagram of the fully decorated  $[\text{Pt}_{19}(\text{CO})_{17}\{\text{Cd}_5(\mu\text{-Br})_5\text{Br}_3(\text{Me}_2\text{CO})_2\}\{\text{Cd}_5(\mu\text{-Br})_5\text{Br}(\text{Me}_2\text{CO})_4\}]^{4-}$ . The surface isovalue of the inserted plots of orbitals is  $\pm 0.02$  (e/bohr<sup>3</sup>)<sup>1/2</sup>.

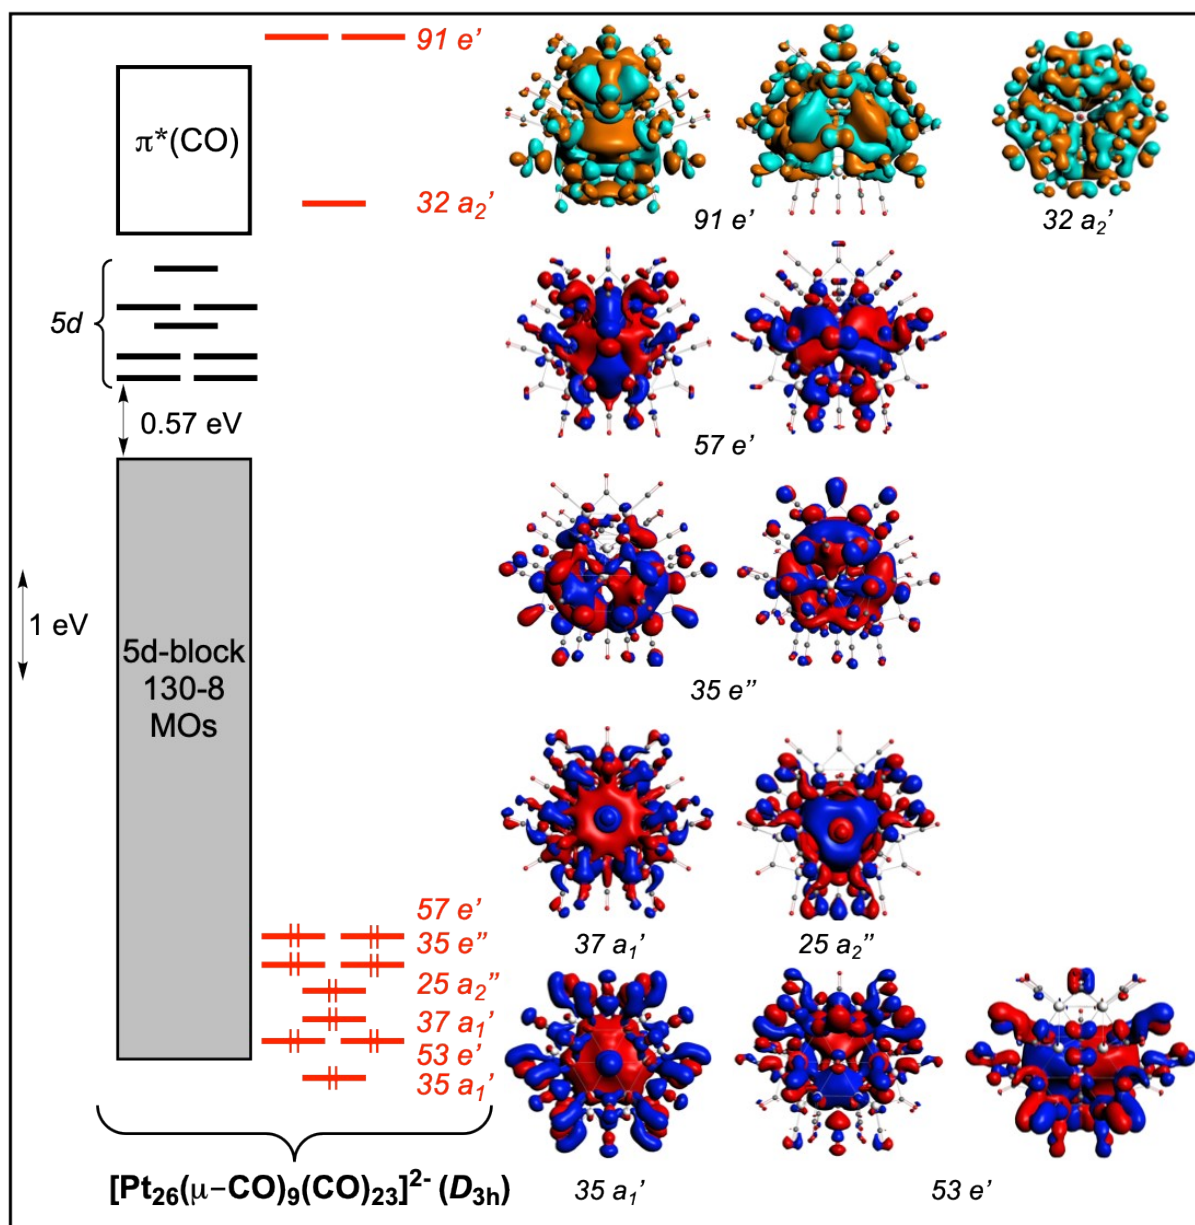

**Fig. S12** Kohn-Sham orbital diagram of  $[\text{Pt}_{26}(\mu_2\text{-CO})_9(\text{CO})_{23}]^{2-}$ . The *supermolecular* orbitals plotted on the right side are reminiscent of the valence orbitals of the hypothetical triangular isomer of  $\text{O}_3$ . The surface isovalue of the inserted plots of *supermolecular* orbitals is  $\pm 0.01$   $(e/\text{bohr}^3)^{1/2}$ .



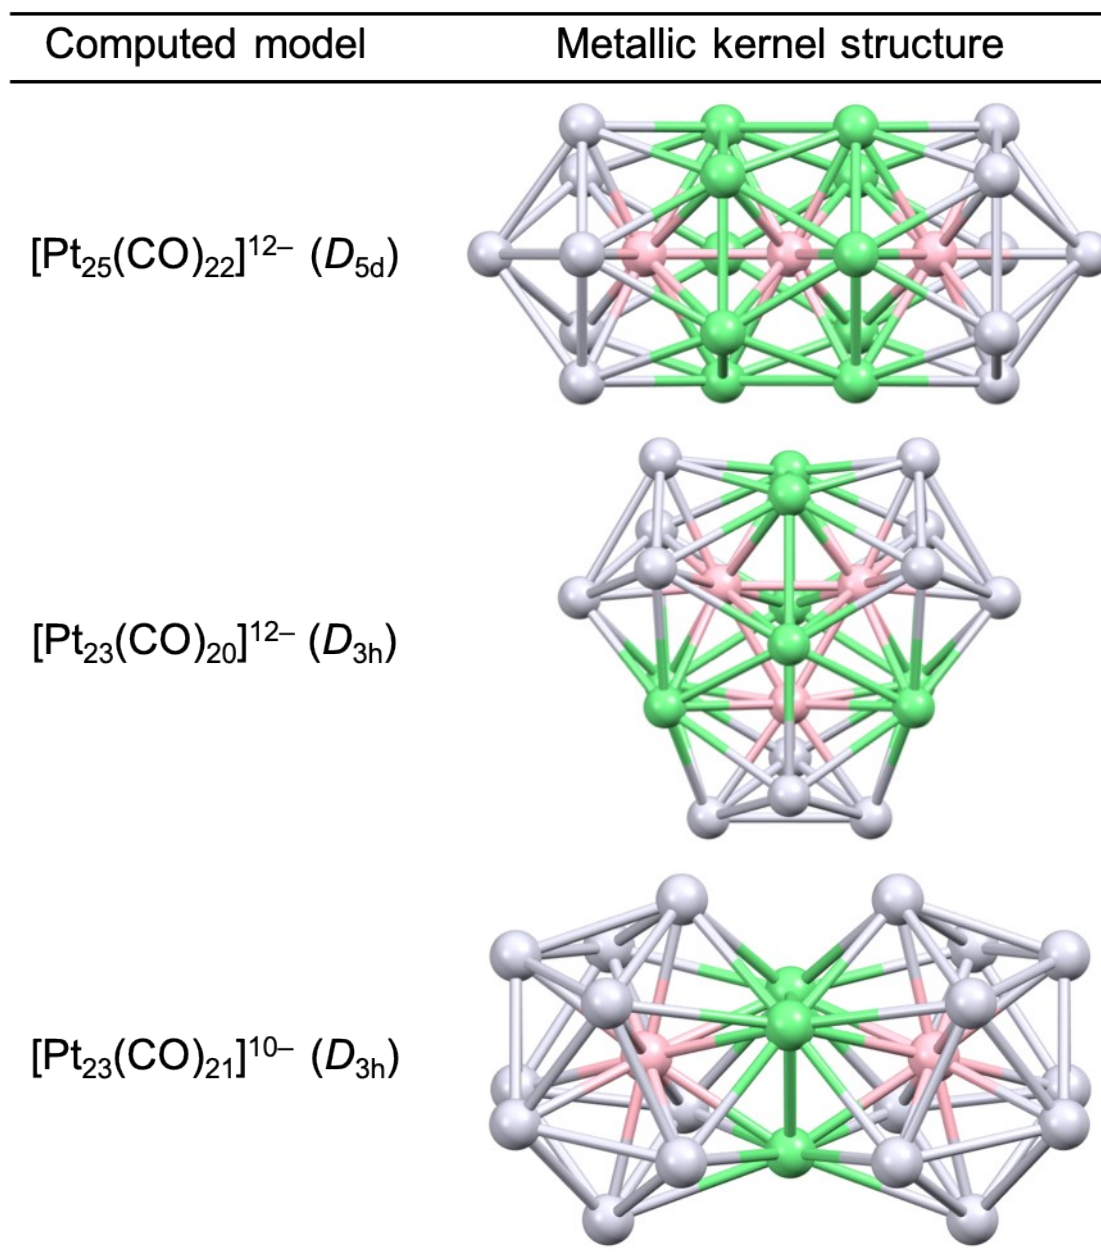

**Fig. S13** Metallic kernel structure of the linear assemblies of individual icosahedral superatoms (hypothetical models). Light-grey, pink and green spheres are outer Pt, central Pt and the Pt shared between two or three *superatoms*, respectively.

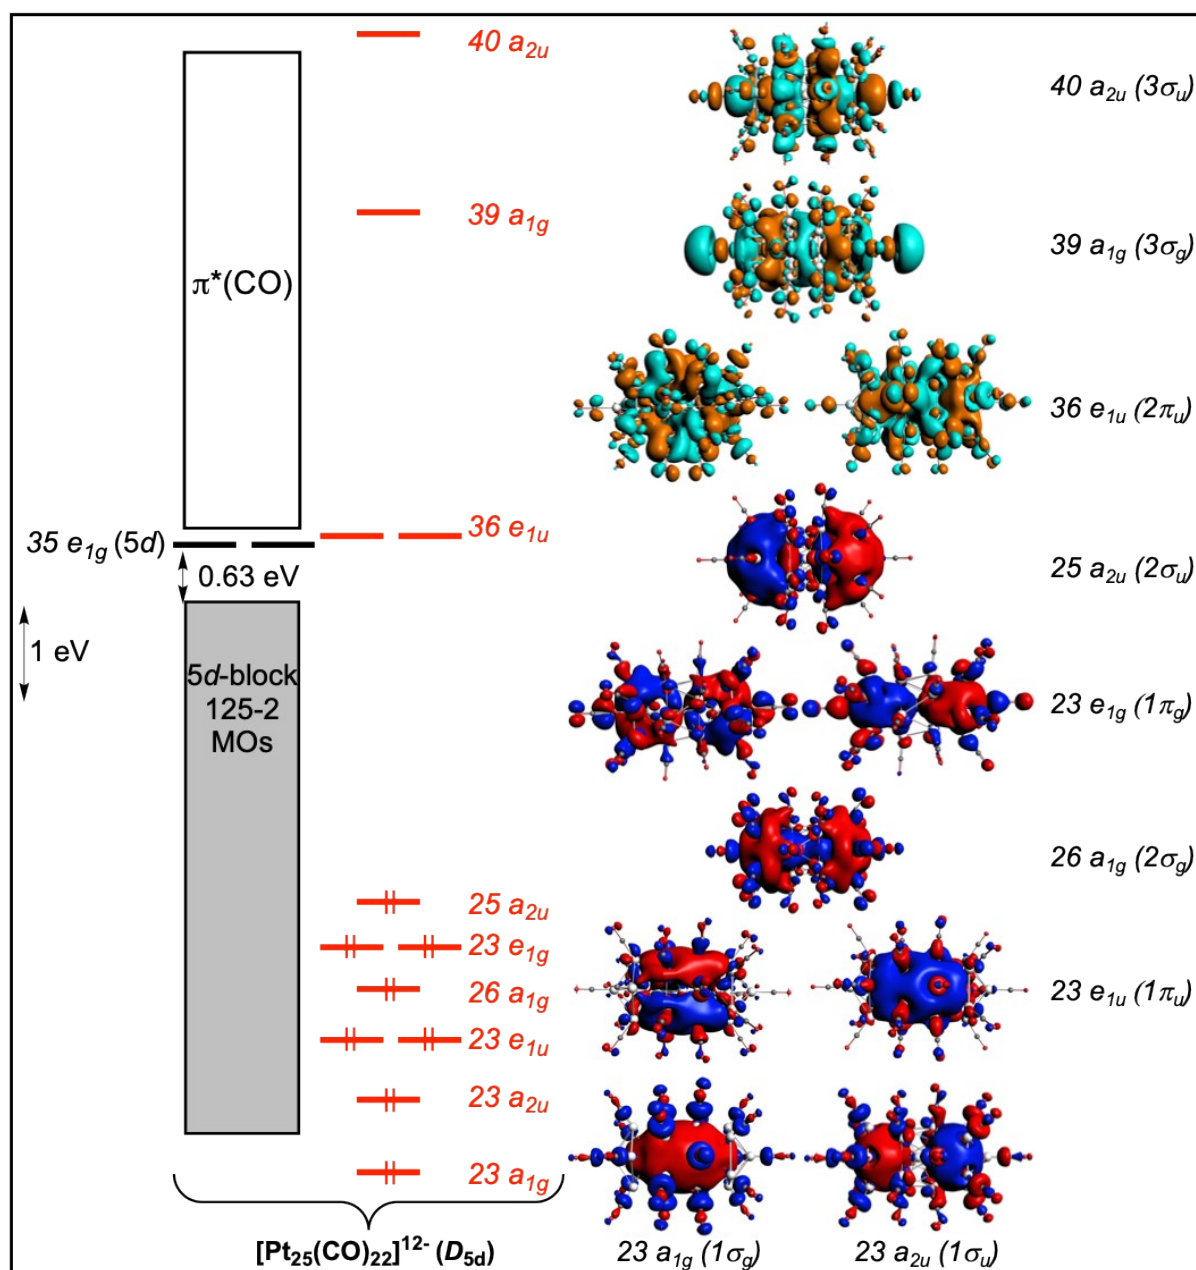

**Fig. S14** Kohn-Sham orbital diagram of the hypothetical  $[\text{Pt}_{25}(\text{CO})_{22}]^{12-}$ , the core of which is made of three interpenetrating centered icosahedra. The *supermolecular* orbitals plotted on the right side are reminiscent of the valence orbitals of  $\text{CO}_2$ . The surface isovalue of the inserted plots of *supermolecular* orbitals is  $\pm 0.01 (\text{e}/\text{bohr}^3)^{1/2}$ .

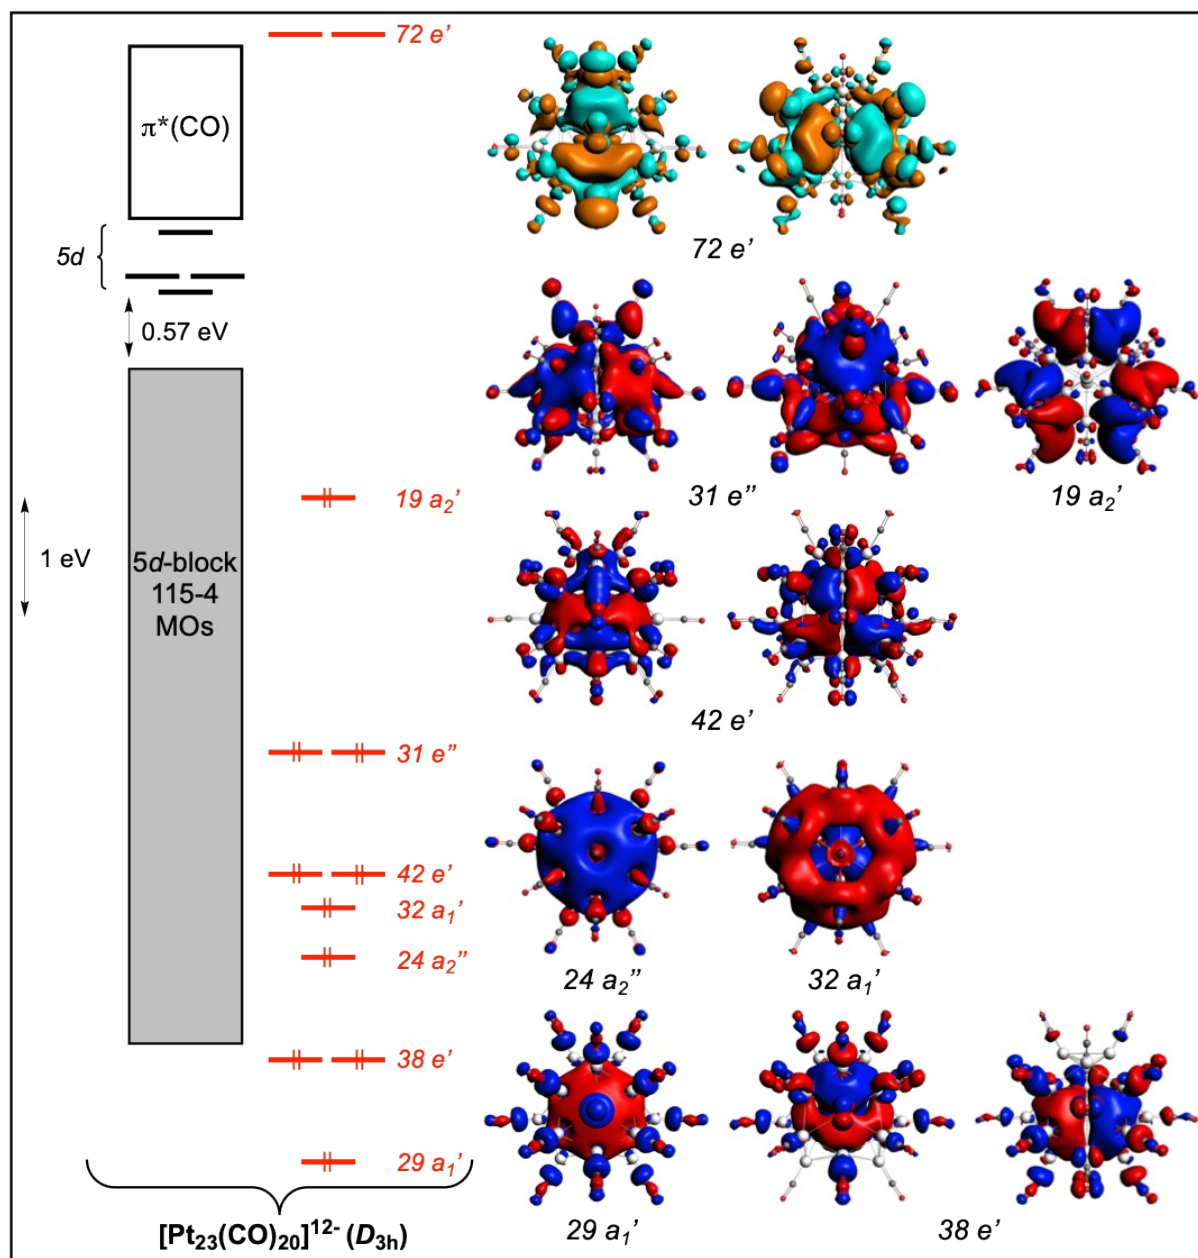

**Fig. S15** Kohn-Sham orbital diagram of the hypothetical  $[\text{Pt}_{23}(\text{CO})_{20}]^{12-}$ , the core of which is made of three interpenetrated icosahedra. The *supermolecular* orbitals are plotted on the right side. The surface isovalue of the inserted plots of *supermolecular* orbitals is  $\pm 0.01 (\text{e}/\text{bohr}^3)^{1/2}$ .

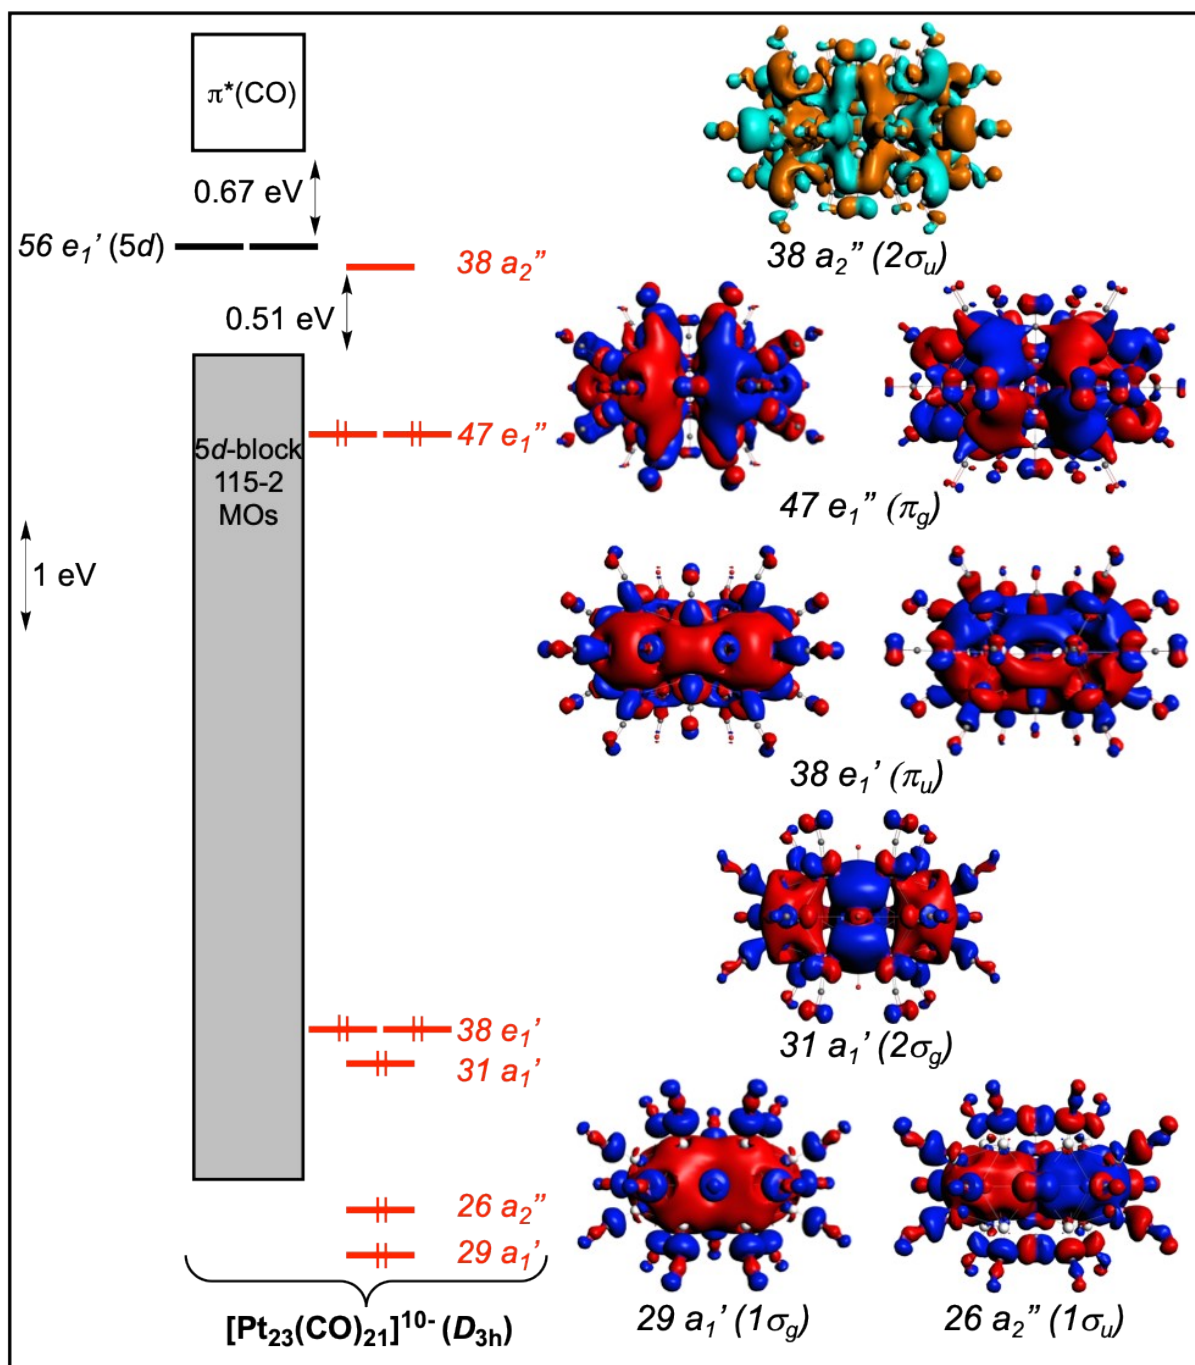

**Fig. S16** Kohn-Sham orbital diagram of the hypothetical [Pt<sub>23</sub>(CO)<sub>21</sub>]<sup>10-</sup>, the core of which is made of two face-sharing centered icosahedra. The *supermolecular* orbitals, plotted on the right side, are reminiscent of the valence orbitals of F<sub>2</sub>. The surface isovalue of the inserted plots of *supermolecular* orbitals is  $\pm 0.01$  (e/bohr<sup>3</sup>)<sup>1/2</sup>.

| Computed model                                                                                               | Metallic kernel structure |
|--------------------------------------------------------------------------------------------------------------|---------------------------|
| $[\text{Pt}_{38}(\mu\text{-CO})_{12}(\text{CO})_{32}]^{2-}$                                                  |                           |
| $[\text{Pt}_{36}(\mu\text{-CO})_{18}(\text{CO})_{26}]^{2-}$                                                  |                           |
| $[\text{Pt}_{19}(\mu_3\text{-CO})_3(\mu\text{-CO})_3(\text{CO})_{18}(\mu_4\text{-AuPH}_3)_3]^{-}$            |                           |
| $[\text{Pt}_{19}(\mu_3\text{-CO})(\mu\text{-CO})_5(\text{CO})_{18}(\mu_4\text{-Au}_2(\text{PH}_3)_2)_2]^{-}$ |                           |
| $[\text{Pt}_{24}(\mu\text{-CO})_8(\text{CO})_{22}]^{2-}$                                                     |                           |
| $[\text{Pt}_{33}(\mu\text{-CO})_{10}(\text{CO})_{28}]^{2-}$                                                  |                           |
| $[\text{Pt}_{40}(\mu\text{-CO})_{16}(\text{CO})_{24}]^{6-}$                                                  |                           |



**Fig. S17** Metallic kernel structure of various clusters with non-spherical 3D structure. Light-grey, pink and golden-yellow spheres are outer Pt, inner Pt that belong to the encapsulated polyhedron and Au atoms, respectively.

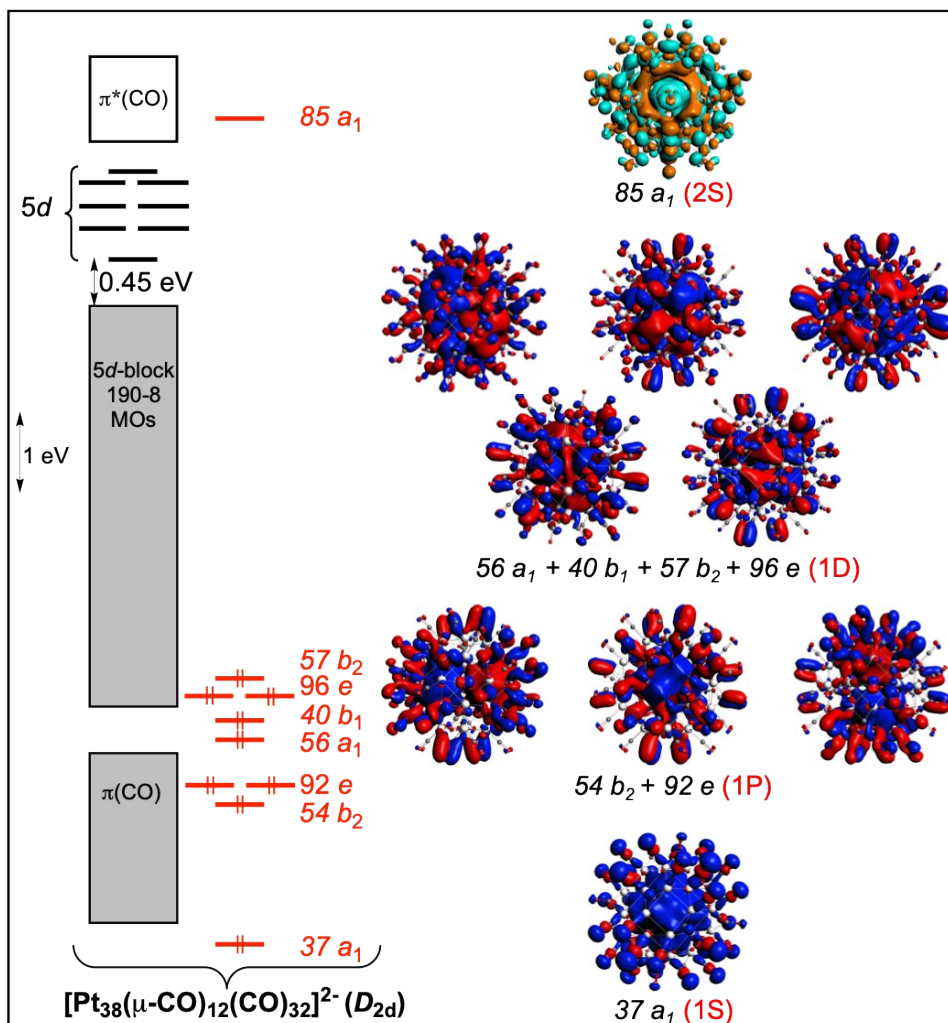

**Fig. S18** Kohn-Sham orbital diagram of the pseudo-spherical  $[\text{Pt}_{38}(\mu_2\text{-CO})_{12}(\text{CO})_{32}]^{2-}$  ( $\text{Pt}_6@Pt_{32}$ ). The *supermolecular* orbitals, plotted on the right side, are consistent with the  $1S^2 1P^8 1D^{10}$  configuration. The surface isovalue of the inserted plots of *superatomic* orbitals is  $\pm 0.01$  ( $e/\text{bohr}^3$ )<sup>1/2</sup>.

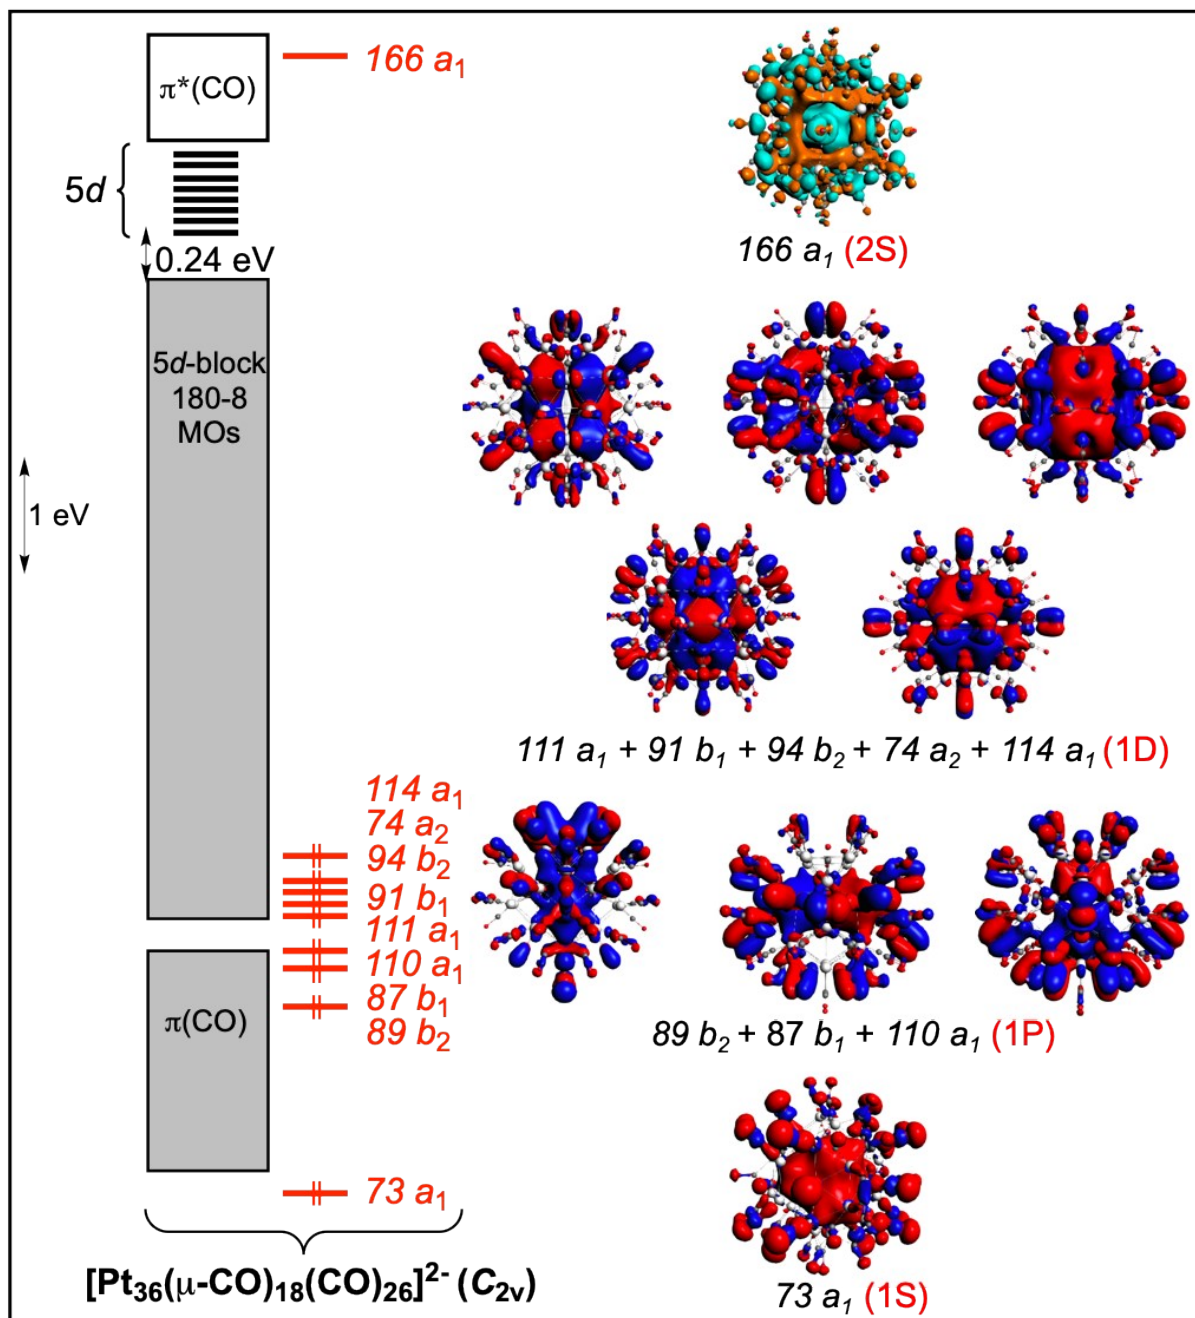

**Fig. S19** Kohn-Sham MO diagram of  $[\text{Pt}_{36}(\mu\text{-CO})_{18}(\text{CO})_{26}]^{2-}$ . The *supermolecular* orbitals, plotted on the right side, are consistent with the  $1S^2 1P^8 1D^{10}$  configuration. The surface isovalue of the inserted plots of *superatomic* orbitals is  $\pm 0.01$  (e/bohr<sup>3</sup>)<sup>1/2</sup>.



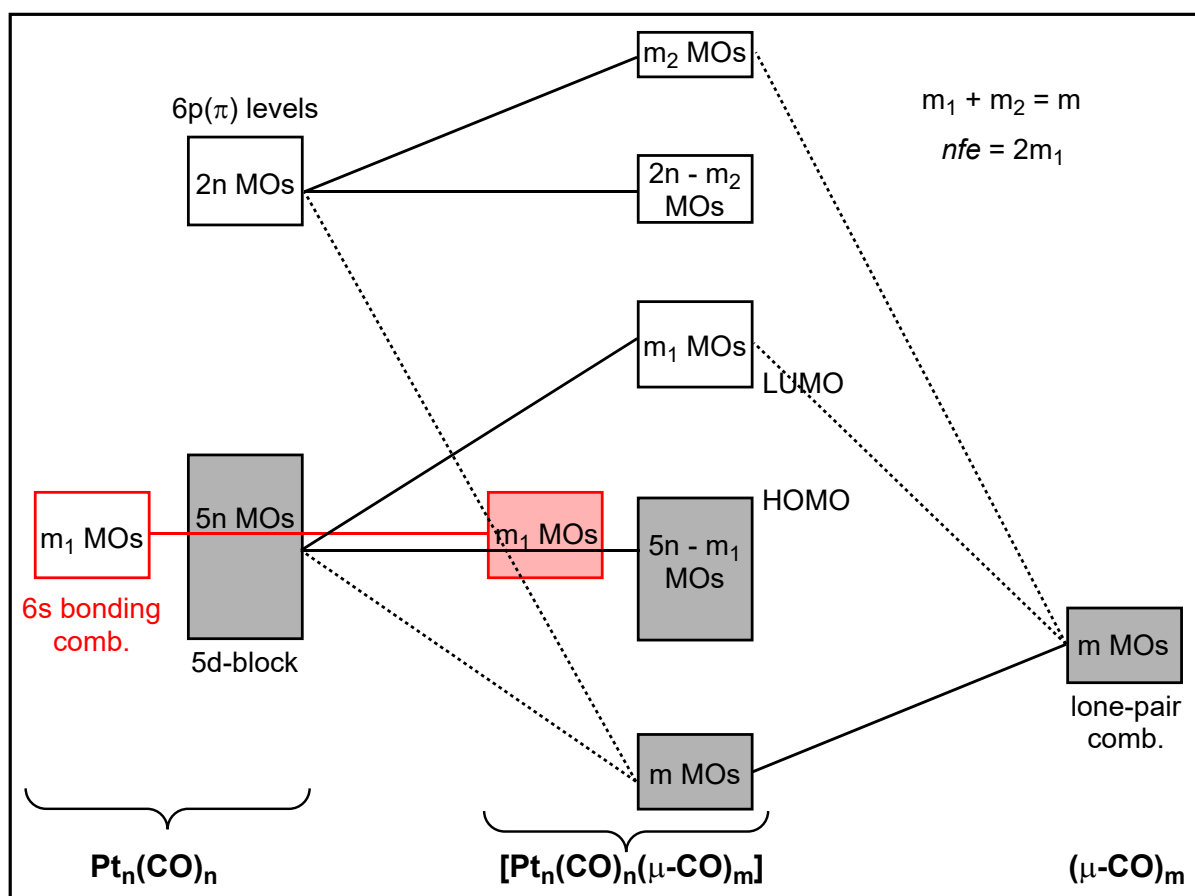

**Fig. S20** Simplified MO interaction diagram between the  $\text{Pt}_n(\text{CO})_n$  and  $(\mu\text{-CO})_m$  fragments in a neutral  $[\text{Pt}_n(\text{CO})_n(\mu\text{-CO})_m]$  nanocluster with  $n$  terminal and  $m$  bridging carbonyls (no qualitative change if  $\mu_3\text{-CO}$ s in the place of  $\mu\text{-CO}$ s). Both the  $\pi^*(\text{CO})$  levels and the antibonding  $6s(\text{Pt})$  combinations (all vacant orbitals) are not shown, as well as the  $n$  occupied low-lying bonding MOs associated with the  $n$   $\text{Pt}\text{-CO}_{\text{terminal}}$  bonds. In the case of a dianionic  $[\text{Pt}_n(\text{CO})_n(\mu\text{-CO})_m]^{2-}$  species, for example, then the number of  $6s$  bonding (occupied) combinations would be  $m_1 + 1$  and  $nfe = 2m_1 + 2$ . The bridging COs are necessary to get a closed-shell configuration with the  $6s$  bonding combinations filled but their total number  $m$  and the  $m_1/m_2$  ratio are difficult to predict owing to their dependence on complex topological parameters.

**Table S1.** Relevant computed data for  $[\text{Pt}_{13}(\text{CO})_{12}]^{8-}$ .

|                                   |                                  | $[\text{Pt}_{13}(\text{CO})_{12}]^{8-}$ |
|-----------------------------------|----------------------------------|-----------------------------------------|
| HOMO-LUMO gap                     |                                  | 1.41 eV                                 |
| Distances (Å)<br>[Wiberg indices] | Pt <sub>c</sub> -Pt <sub>p</sub> | av. 2.781 [0.1518]                      |
|                                   | Pt <sub>p</sub> -Pt <sub>p</sub> | av. 2.923 [0.0688]                      |
|                                   | Pt <sub>p</sub> -C               | av. 1.829 [1.1925]                      |
| NAO Charges<br>(av.)              | Pt <sub>c</sub>                  | -0.96                                   |
|                                   | Pt <sub>p</sub>                  | -0.12                                   |
|                                   | CO                               | -0.48                                   |

**Table S2.** Relevant computed data for  $[\text{Pt}_{13}(\text{CO})_{12}\{\text{Cd}_5(\mu\text{-Br})_5\text{Br}_2(\text{dmf})_3\}_2]^{2-}$ . The atomic distances are given in Å, Wiberg indices are given in brackets. Experimental bond distances are reported for comparison.

|                                                         |                  | $[\text{Pt}_{13}(\text{CO})_{12}\{\text{Cd}_5(\mu\text{-Br})_5\text{Br}_2(\text{dmf})_3\}_2]^{2-}$ |                          |
|---------------------------------------------------------|------------------|----------------------------------------------------------------------------------------------------|--------------------------|
|                                                         |                  | Calc.                                                                                              | Exp. <sup>1</sup>        |
| HOMO-LUMO gap                                           |                  | 1.19 eV                                                                                            | -                        |
| $\text{Pt}_{\text{cent.}}$ - $\text{Pt}_{\text{vert.}}$ |                  | 2.727-2.757<br>av. 2.742 [0.1052]                                                                  | 2.696-2.718<br>av. 2.707 |
| $\text{Pt}_{\text{vert.}}$ - $\text{Pt}_{\text{vert.}}$ |                  | 2.765-2.988<br>av. 2.882 [0.0650]                                                                  | 2.765-2.912<br>av. 2.850 |
| $\text{Cd}_{\text{Br}}$ - $\text{Pt}_{5 \text{ ring}}$  |                  | 2.868-2.891<br>av. 2.877 [0.0741]                                                                  | av. 2.826                |
| $\text{Cd}_{\text{Br}}$ - $\text{Pt}_{\text{apical}}$   |                  | 3.308-3.321<br>av. 3.315 [0.0229]                                                                  | av. 3.262                |
| $\text{Cd}_{\text{dmf}}$ - $\text{Pt}_{5 \text{ ring}}$ |                  | 2.821-2.865<br>av. 2.843 [0.0954]                                                                  | av. 2.807                |
| $\text{Cd}_{\text{dmf}}$ - $\text{Pt}_{\text{apical}}$  |                  | 3.006-3.051<br>av. 3.022 [0.0536]                                                                  | av. 3.031                |
| $\text{Cd-Br}_{\text{br}}$                              |                  | 2.704-2.822<br>av. 2.756 [0.2111]                                                                  | av. 2.711                |
| $\text{Cd-Br}_{\text{terminal}}$                        |                  | 2.649-2.663<br>av. 2.656 [0.2975]                                                                  | av. 2.567                |
| $\text{Cd-O}$                                           |                  | 2.388-2.408<br>av. 2.396 [0.0742]                                                                  | av. 2.231                |
| $\text{Pt-C (Carbonyl)}$                                |                  | 1.858-1.897<br>av. 1.873 [0.8318]                                                                  | av. 1.84                 |
| $\text{C-O (Carbonyl)}$                                 |                  | 1.156-1.168<br>av. 1.162 [2.0157]                                                                  | av. 1.14                 |
| NAO charges<br>(av.)                                    | $\text{Pt}_1$    | -0.54                                                                                              | -                        |
|                                                         | $\text{Pt}_{12}$ | -0.29                                                                                              | -                        |
|                                                         | CO               | -0.15                                                                                              | -                        |
|                                                         | L                | +1.91                                                                                              | -                        |

**Table S3.** Relevant computed data for the  $\text{Pt}_{13}(\text{Au}_2\text{L}_2)_2(\mu\text{-CO})_2(\text{CO})_8(\text{L})_4$  ( $\text{L} = \text{CO}, \text{PH}_3$ ) clusters. Experimental bond distances are reported for comparison.

|                                   |                                  | $\text{Pt}_{13}(\text{Au}_2(\text{X})_2)_2(\mu\text{-CO})_2(\text{CO})_8(\text{X})_4$ |                     |                   |
|-----------------------------------|----------------------------------|---------------------------------------------------------------------------------------|---------------------|-------------------|
|                                   |                                  | L = CO                                                                                | L = PH <sub>3</sub> | Exp. <sup>2</sup> |
| HOMO-LUMO gap                     |                                  | 0.96 eV                                                                               | 0.93 eV             |                   |
| Distances (Å)<br>[Wiberg indices] | Pt <sub>c</sub> -Pt <sub>p</sub> | av. 2.729 [0.1461]                                                                    | av. 2.726 [0.1458]  | av. 2.707         |
|                                   | Pt <sub>p</sub> -Pt <sub>p</sub> | av. 2.869 [0.0766]                                                                    | av. 2.866 [0.0681]  | av. 2.846         |
|                                   | Pt <sub>p</sub> -Au <sub>b</sub> | av. 2.775 [0.1281]                                                                    | av. 2.779 [0.1316]  | av. 2.783         |
|                                   | Au <sub>b</sub> -Au <sub>b</sub> | av. 3.202 [0.0184]                                                                    | av. 3.151 [0.0237]  | av. 3.131         |
|                                   | Pt <sub>p</sub> -CO <sub>t</sub> | av. 1.873 [0.8488]                                                                    | av. 1.864 [0.8887]  | av. 1.877         |
|                                   | Pt <sub>p</sub> -CO <sub>b</sub> | av. 2.048 [0.5759]                                                                    | av. 2.025 [0.6167]  | av. 2.007         |
|                                   | Pt <sub>p</sub> -L               | av. 1.893 [0.7598]                                                                    | av. 2.242 [0.4516]  | av. 2.260         |
|                                   | Au <sub>b</sub> -L               | av. 1.928 [0.7622]                                                                    | av. 2.261 [0.5201]  | av. 2.247         |
| NAO Charges<br>(av.)              | Pt <sub>c</sub>                  | -0.75                                                                                 | -0.65               |                   |
|                                   | Pt <sub>p</sub>                  | -0.06                                                                                 | -0.10               |                   |
|                                   | Au <sub>b</sub>                  | +0.48                                                                                 | +0.31               |                   |

**Table S4.** Relevant computed data for the  $\text{Pt}_{13}(\text{Pt}_2(\mu\text{-CO})(\text{L})_2)_2(\mu\text{-CO})_2(\text{CO})_8(\text{L})_4$  ( $\text{L} = \text{CO}$ ,  $\text{PH}_3$ ) clusters. Experimental bond distances are reported for comparison.

|                                   |                                  | $\text{Pt}_{13}(\text{Pt}_2(\mu\text{-CO})(\text{L})_2)_2(\text{CO})_{10}(\text{L})_4$ |                          |                   |
|-----------------------------------|----------------------------------|----------------------------------------------------------------------------------------|--------------------------|-------------------|
|                                   |                                  | $\text{L} = \text{CO}$                                                                 | $\text{L} = \text{PH}_3$ | Exp. <sup>3</sup> |
| HOMO-LUMO gap                     |                                  | 0.30 eV                                                                                | 0.35 eV                  |                   |
| Distances (Å)<br>[Wiberg indices] | Pt <sub>c</sub> -Pt <sub>p</sub> | av. 2.728 [0.1452]                                                                     | av. 2.724 [0.1439]       | av. 2.698         |
|                                   | Pt <sub>p</sub> -Pt <sub>p</sub> | av. 2.869 [0.0804]                                                                     | av. 2.862 [0.0816]       | av. 2.837         |
|                                   | Pt <sub>p</sub> -Pt <sub>b</sub> | av. 2.768 [0.1316]                                                                     | av. 2.776 [0.1337]       | av. 2.780         |
|                                   | Pt <sub>b</sub> -Pt <sub>b</sub> | av. 2.936 [0.0964]                                                                     | av. 2.891 [0.1096]       | av. 2.860         |
|                                   | Pt <sub>p</sub> -CO <sub>t</sub> | av. 1.871 [0.8336]                                                                     | av. 1.861 [0.8747]       | 1.64 – 1.83       |
|                                   | Pt <sub>p</sub> -CO <sub>b</sub> | av. 2.057 [0.5653]                                                                     | av. 2.030 [0.6086]       | 1.94 – 2.13       |
|                                   | Pt <sub>p</sub> -L               | av. 1.896 [0.7534]                                                                     | av. 2.245 [0.4509]       | 2.20 – 2.26       |
|                                   | Pt <sub>b</sub> -CO <sub>b</sub> | av. 2.035 [0.6224]                                                                     | av. 2.007 [0.6727]       | 1.94 – 2.13       |
|                                   | Pt <sub>b</sub> -L               | av. 1.872 [0.9068]                                                                     | av. 2.219 [0.5774]       | 2.20 – 2.26       |
| NAO Charges<br>(av.)              | Pt <sub>c</sub>                  | -0.76                                                                                  | -0.66                    |                   |
|                                   | Pt <sub>p</sub>                  | -0.02                                                                                  | -0.06                    |                   |
|                                   | Pt <sub>b</sub>                  | +0.28                                                                                  | +0.12                    |                   |

**Table S5.** Relevant computed data for the  $[\text{Pt}_{14}(\mu\text{-CO})_6(\text{CO})_{12}]^{4+}$  and  $[\text{Pt}_{15}(\mu\text{-CO})_8(\text{CO})_{11}]^{4+}$  clusters. Experimental bond distances are reported for comparison.<sup>4,5</sup>

|               |                                  | $[\text{Pt}_{14}(\mu\text{-CO})_6(\text{CO})_{12}]^{4+}$ | $[\text{Pt}_{15}(\mu\text{-CO})_8(\text{CO})_{11}]^{4+}$ |
|---------------|----------------------------------|----------------------------------------------------------|----------------------------------------------------------|
| HOMO-LUMO gap |                                  | 1.00 eV                                                  | 1.09 eV                                                  |
| Distances (Å) | Pt <sub>c</sub> -Pt <sub>p</sub> | av. 2.777<br>exp. 2.730                                  | av. 2.775<br>exp. 2.731                                  |
|               | Pt <sub>p</sub> -Pt <sub>p</sub> | av. 2.867<br>exp. 2.821                                  | av. 2.874<br>exp. 2.827                                  |
|               | Pt <sub>p</sub> -Pt <sub>b</sub> | -                                                        | av. 2.753<br>exp. 2.681                                  |
|               | Pt <sub>p</sub> -C <sub>t</sub>  | av. 1.862<br>exp. 1.844                                  | av. 1.860<br>exp. 1.858                                  |
|               | Pt <sub>p</sub> -C <sub>b</sub>  | av. 2.033<br>exp. 2.004                                  | av. 2.037<br>exp. 2.011                                  |

**Table S6.** Relevant computed data for the  $[\text{Pt}_{19}(\text{CO})_{17}]^{8-/10-}$  clusters. Experimental bond distances are reported for comparison.

|                                   |                                  | $[\text{Pt}_{19}(\text{CO})_{17}]^{10-}$ | $[\text{Pt}_{19}(\text{CO})_{17}]^{8-}$             | Exp. <sup>1</sup> |
|-----------------------------------|----------------------------------|------------------------------------------|-----------------------------------------------------|-------------------|
| HOMO-LUMO or SOMO-LUMO gap        |                                  | 0.37 eV                                  | Spin- $\alpha$ : 0.47 eV<br>Spin- $\beta$ : 0.09 eV |                   |
| Distances (Å)<br>[Wiberg indices] | Pt <sub>c</sub> -Pt <sub>c</sub> | av. 2.611 [0.0984]                       | av. 2.571                                           | av. 2.557         |
|                                   | Pt <sub>c</sub> -Pt <sub>p</sub> | av. 2.813 [0.1298]                       | av. 2.782                                           | av. 2.730         |
|                                   | Pt <sub>p</sub> -Pt <sub>p</sub> | av. 2.960 [0.0604]                       | av. 2.922                                           | av. 2.866         |
|                                   | Pt <sub>p</sub> -C               | av. 1.829 [1.1851]                       | av. 1.832                                           | av. 1.800         |
| NAO Charges<br>(av.)              | Pt <sub>c</sub>                  | -0.80                                    |                                                     |                   |
|                                   | Pt <sub>p</sub>                  | -0.07                                    |                                                     |                   |
|                                   | CO                               | -0.43                                    |                                                     |                   |

**Table S7.** Computed data for  $[\text{Pt}_{19}(\text{CO})_{17}\{\text{Cd}_5(\mu\text{-Br})_5\text{Br}_3(\text{Me}_2\text{CO})_2\}\{\text{Cd}_5(\mu\text{-Br})_5\text{Br}(\text{Me}_2\text{CO})_4\}]^{x-}$  ( $x = 2, 4$ ). The atomic distances are given in Å. Wiberg indices are given in brackets. Experimental bond distances are given for comparison.

|                                    | $[\text{Pt}_{19}(\text{CO})_{17}\{\text{Cd}_5(\mu\text{-Br})_5\text{Br}_3(\text{Me}_2\text{CO})_2\}\{\text{Cd}_5(\mu\text{-Br})_5\text{Br}(\text{Me}_2\text{CO})_4\}]^{2-}$ | $[\text{Pt}_{19}(\text{CO})_{17}\{\text{Cd}_5(\mu\text{-Br})_5\text{Br}_3(\text{Me}_2\text{CO})_2\}\{\text{Cd}_5(\mu\text{-Br})_5\text{Br}(\text{Me}_2\text{CO})_4\}]^{4-}$ | Exp. <sup>1</sup>        |
|------------------------------------|-----------------------------------------------------------------------------------------------------------------------------------------------------------------------------|-----------------------------------------------------------------------------------------------------------------------------------------------------------------------------|--------------------------|
| HOMO-LUMO or SOMO-LUMO gap (eV)    | $\alpha$ -electron: 0.72 eV<br>$\beta$ -electron: 0.08 eV                                                                                                                   | 0.70 eV                                                                                                                                                                     | -                        |
| Pt <sub>c</sub> -Pt <sub>c</sub> ' | 2.594                                                                                                                                                                       | 2.590 [0.1161]                                                                                                                                                              | 2.557                    |
| Pt <sub>c</sub> -Pt <sub>p</sub>   | 2.683-2.859<br>av. 2.761                                                                                                                                                    | 2.688-2.852<br>av. 2.770 [0.1184]                                                                                                                                           | 2.663-2.793<br>av. 2.730 |
| Pt <sub>p</sub> -Pt <sub>p</sub>   | 2.755-3.043<br>av. 2.894                                                                                                                                                    | 2.778-3.112<br>av. 2.903 [0.0630]                                                                                                                                           | 2.775-2.976<br>av. 2.866 |
| Cd-Pt <sub>5 ring</sub>            | 2.789-2.911<br>av. 2.856                                                                                                                                                    | 2.774-2.911<br>av. 2.841 [0.1113]                                                                                                                                           | av. 2.790                |
| Cd-Pt <sub>apical</sub>            | 2.939-3.410<br>av. 3.093                                                                                                                                                    | 2.911-3.394<br>av. 3.074 [0.0526]                                                                                                                                           | av. 3.019                |
| Cd-Br <sub>br</sub>                | 2.692-2.855<br>av. 2.765                                                                                                                                                    | 2.693-3.026<br>av. 2.812 [0.1775]                                                                                                                                           | av. 2.741                |
| Cd-Br <sub>terminal</sub>          | 2.621-2.629<br>av. 2.625                                                                                                                                                    | 2.650-2.662<br>av. 2.657 [0.2989]                                                                                                                                           | av. 2.637                |
| Cd-O                               | 2.458-2.488<br>av. 2.475                                                                                                                                                    | 2.517-2.555<br>av. 2.540 [0.0670]                                                                                                                                           | av. 2.350                |
| Pt-C (Carbonyl)                    | 1.848-1.900<br>av. 1.865                                                                                                                                                    | 1.841-1.897<br>av. 1.861 [0.8762]                                                                                                                                           | av. 1.800                |
| C-O (Carbonyl)                     | 1.153-1.169<br>av. 1.160                                                                                                                                                    | 1.155-1.174<br>av. 1.164 [2.0414]                                                                                                                                           | av. 1.170                |
| NAO charges                        | Pt <sub>cent</sub>                                                                                                                                                          | -                                                                                                                                                                           | -0.55                    |
|                                    | Pt <sub>apical</sub>                                                                                                                                                        | -                                                                                                                                                                           | -0.46                    |
|                                    | Pt <sub>outer</sub>                                                                                                                                                         | -                                                                                                                                                                           | -0.21                    |
|                                    | CO                                                                                                                                                                          | -                                                                                                                                                                           | -0.08                    |
|                                    | Cd <sub>5</sub> ( $\mu\text{-Br}$ ) <sub>5</sub> Br <sub>3</sub> (Me <sub>2</sub> C                                                                                         | -                                                                                                                                                                           | +0.62                    |

|  |                                                                                  |   |       |  |
|--|----------------------------------------------------------------------------------|---|-------|--|
|  | O <sub>2</sub>                                                                   |   |       |  |
|  | Cd <sub>5</sub> (μ<br>Br) <sub>5</sub> Br(Me <sub>2</sub> CO<br>) <sub>4</sub> } | - | +1.91 |  |

**Table S8.** Relevant computed data for [Pt<sub>19</sub>(μ-CO)<sub>10</sub>(CO)<sub>12</sub>]<sup>4-</sup>. Experimental bond distances are given for comparison.

|                                   |                                  | [Pt <sub>19</sub> (μ-CO) <sub>10</sub> (CO) <sub>12</sub> ] <sup>4-</sup> | Exp. <sup>6</sup> |
|-----------------------------------|----------------------------------|---------------------------------------------------------------------------|-------------------|
| HOMO-LUMO gap                     |                                  | 0.80 eV                                                                   |                   |
| Distances (Å)<br>[Wiberg indices] | Pt <sub>c</sub> -Pt <sub>c</sub> | av. 2.710 [0.1309]                                                        | av. 2.641         |
|                                   | Pt <sub>c</sub> -Pt <sub>p</sub> | av. 2.813 [0.1183]                                                        | av. 2.794         |
|                                   | Pt <sub>p</sub> -Pt <sub>p</sub> | av. 2.821 [0.0928]                                                        | av. 2.797         |
|                                   | Pt <sub>p</sub> -C <sub>t</sub>  | av. 1.857 [0.9237]                                                        | -                 |
|                                   | Pt <sub>p</sub> -C <sub>b</sub>  | av. 2.025 [0.5576]                                                        | -                 |
| NAO Charges<br>(av.)              | Pt <sub>c</sub>                  | -0.66                                                                     |                   |
|                                   | Pt <sub>p</sub>                  | +0.13                                                                     |                   |
|                                   | CO                               | -0.22                                                                     |                   |

**Table S9.** Relevant computed data for [Pt<sub>26</sub>(μ-CO)<sub>9</sub>(CO)<sub>23</sub>]<sup>2-</sup>. Experimental bond distances are given for comparison.

|  | [Pt <sub>26</sub> (μ-CO) <sub>9</sub> (CO) <sub>23</sub> ] <sup>2-</sup> | Exp. <sup>4</sup> |
|--|--------------------------------------------------------------------------|-------------------|
|  |                                                                          |                   |



|                                   |                                  |                    |           |
|-----------------------------------|----------------------------------|--------------------|-----------|
| HOMO-LUMO gap                     |                                  | 0.57 eV            |           |
| Distances (Å)<br>[Wiberg indices] | Pt <sub>3</sub> -Pt <sub>3</sub> | av. 2.813 [0.0630] | av. 2.803 |
|                                   | Pt <sub>3</sub> -Pt <sub>p</sub> | av. 2.823 [0.1072] | av. 2.801 |
|                                   | Pt <sub>p</sub> -Pt <sub>p</sub> | av. 2.827 [0.0809] | av. 2.804 |
|                                   | Pt <sub>p</sub> -C <sub>t</sub>  | av. 1.875 [0.8001] | av. 1.840 |
|                                   | Pt <sub>p</sub> -C <sub>b</sub>  | av. 2.029 [0.5536] | av. 1.960 |
| NAO Charges<br>(av.)              | Centered Pt <sub>3</sub>         | -0.63              |           |
|                                   | μ <sub>6</sub> -Pt <sub>p</sub>  | -0.07              |           |
|                                   | Pt <sub>p</sub>                  | +0.20              |           |
|                                   | Pt <sub>capping</sub>            | +0.22              |           |
|                                   | CO                               | -0.11              |           |

**Table S10.** Relevant computed data for  $[\text{Pt}_{23}(\mu\text{-CO})_{13}(\text{CO})_{14}]^{2-}$ . Experimental bond distances are given for comparison.

|               |                                  | $[\text{Pt}_{23}(\mu\text{-CO})_{13}(\text{CO})_{14}]^{2-}$ | Exp. <sup>4</sup> |
|---------------|----------------------------------|-------------------------------------------------------------|-------------------|
| HOMO-LUMO gap |                                  | 0.42 eV                                                     |                   |
| Distances (Å) | Pt <sub>3</sub> -Pt <sub>3</sub> | av. 2.679                                                   | av. 2.655         |
|               | Pt <sub>3</sub> -Pt <sub>p</sub> | av. 2.878                                                   | av. 2.808         |
|               | Pt <sub>p</sub> -Pt <sub>p</sub> | av. 2.966                                                   | av. 2.936         |
|               | Pt <sub>p</sub> -C <sub>t</sub>  | av. 1.874                                                   | av. 1.821         |
|               | Pt <sub>p</sub> -C <sub>b</sub>  | av. 2.037                                                   | av. 2.001         |

**Table S11.** Relevant computed data for the hypothetical cluster  $[\text{Pt}_{25}(\text{CO})_{22}]^{12-}$ .

|                                   |                                   | $[\text{Pt}_{25}(\text{CO})_{22}]^{12-}$ |
|-----------------------------------|-----------------------------------|------------------------------------------|
| HOMO-LUMO gap                     |                                   | 0.63 eV                                  |
| Distances (Å)<br>[Wiberg indices] | Pt <sub>c</sub> -Pt <sub>c'</sub> | av. 2.710 [0.0766]                       |
|                                   | Pt <sub>c</sub> -Pt <sub>p</sub>  | av. 2.782 [0.1336]                       |
|                                   | Pt <sub>c'</sub> -Pt <sub>p</sub> | av. 2.831 [0.1178]                       |
|                                   | Pt <sub>p</sub> -Pt <sub>p</sub>  | av. 2.988 [0.0596]                       |
|                                   | Pt <sub>p</sub> -C <sub>t</sub>   | av. 1.829 [1.1733]                       |
|                                   | Pt <sub>p</sub> -C <sub>b</sub>   | -                                        |
| NAO Charges<br>(av.)              | Pt <sub>c</sub>                   | -0.71                                    |
|                                   | Pt <sub>c'</sub>                  | -0.79                                    |
|                                   | Pt <sub>p</sub>                   | -0.04                                    |
|                                   | CO                                | =0.40                                    |

**Table S12.** Relevant computed data for the hypothetical cluster  $[\text{Pt}_{23}\text{CO}_{20}]^{12-}$ .

|               |                                  | $[\text{Pt}_{23}(\text{CO})_{20}]^{12-}$ |
|---------------|----------------------------------|------------------------------------------|
| HOMO-LUMO gap |                                  | 0.57 eV                                  |
| Distances (Å) | Pt <sub>3</sub> -Pt <sub>3</sub> | 2.752                                    |
|               | Pt <sub>3</sub> -Pt <sub>p</sub> | av. 2.822                                |
|               | Pt <sub>p</sub> -Pt <sub>p</sub> | av. 3.001                                |
|               | Pt <sub>p</sub> -C               | av. 1.831                                |

**Table S13.** Relevant computed data for the hypothetical cluster  $[\text{Pt}_{23}\text{CO}_{21}]^{10-}$ .

|               |                                  | $[\text{Pt}_{23}(\text{CO})_{21}]^{10-}$ |
|---------------|----------------------------------|------------------------------------------|
| HOMO-LUMO gap |                                  | 0.51 eV                                  |
| Distances (Å) | Pt <sub>c</sub> -Pt <sub>p</sub> | av. 2.781                                |
|               | Pt <sub>p</sub> -Pt <sub>p</sub> | av. 2.951                                |
|               | Pt <sub>p</sub> -C <sub>t</sub>  | av. 1.843                                |

**Table S14.** Relevant computed data for  $[\text{Pt}_{38}(\mu\text{-CO})_{12}(\text{CO})_{32}]^{2-}$ . Experimental bond distances are given for comparison.

|                                   |                                  | $[\text{Pt}_{38}(\mu\text{-CO})_{12}(\text{CO})_{32}]^{2-}$ | Exp. <sup>7</sup> |
|-----------------------------------|----------------------------------|-------------------------------------------------------------|-------------------|
| HOMO-LUMO gap                     |                                  | 0.45 eV                                                     |                   |
| Distances (Å)<br>[Wiberg indices] | Pt <sub>6</sub>                  | av. 2.822 [0.0566]                                          | av. 2.811         |
|                                   | Pt <sub>6</sub> -Pt <sub>p</sub> | av. 2.838 [0.1141]                                          | av. 2.822         |
|                                   | Pt <sub>p</sub> -Pt <sub>p</sub> | av. 2.857 [0.0761]                                          | av. 2.845         |
|                                   | Pt <sub>p</sub> -C <sub>t</sub>  | av. 1.880 [0.7805]                                          | av. 1.857         |
|                                   | Pt <sub>p</sub> -C <sub>b</sub>  | av. 2.021 [0.5574]                                          | av. 1.973         |
| NAO Charges<br>(av.)              | Centered Pt <sub>6</sub>         | -0.55                                                       |                   |
|                                   | Pt <sub>p</sub>                  | +0.17                                                       |                   |
|                                   | CO                               | -0.05                                                       |                   |

**Table S15.** Relevant computed data for  $[\text{Pt}_{36}(\mu\text{-CO})_{18}(\text{CO})_{26}]^{2-}$ . Experimental bond distances are given for comparison.

|               |                                  | $[\text{Pt}_{36}(\mu\text{-CO})_{18}(\text{CO})_{26}]^{2-}$ | Exp. <sup>4</sup> |
|---------------|----------------------------------|-------------------------------------------------------------|-------------------|
| HOMO-LUMO gap |                                  | 0.24 eV                                                     |                   |
| Distances (Å) | Pt <sub>6</sub>                  | av. 2.769                                                   | av. 2.770         |
|               | Pt <sub>6</sub> -Pt <sub>p</sub> | av. 2.830                                                   | av. 2.784         |
|               | Pt <sub>p</sub> -Pt <sub>p</sub> | av. 2.898                                                   | av. 2.855         |
|               | Pt <sub>p</sub> -C <sub>t</sub>  | av. 1.880                                                   | av. 1.833         |
|               | Pt <sub>p</sub> -C <sub>b</sub>  | av. 2.050                                                   | av. 2.011         |

**Table S16.** Relevant computed data for  $[\text{Pt}_{19}(\mu_3\text{-CO})_3(\mu\text{-CO})_3(\text{CO})_{18}(\mu_4\text{-AuPH}_3)_3]^-$ . Experimental bond distances are given for comparison.

|                         |                                  | $[\text{Pt}_{19}(\mu_3\text{-CO})_3(\mu\text{-CO})_3(\text{CO})_{18}(\mu_4\text{-AuPH}_3)_3]^-$ | Exp. <sup>8</sup> |
|-------------------------|----------------------------------|-------------------------------------------------------------------------------------------------|-------------------|
| HOMO-LUMO gap           |                                  | 1.06 eV                                                                                         |                   |
| Distances (Å)           | Pt <sub>3</sub> -Pt <sub>3</sub> | av. 2.835                                                                                       | av. 2.816         |
|                         | Pt <sub>3</sub> -Pt <sub>7</sub> | av. 2.844                                                                                       | av. 2.782         |
|                         | Pt <sub>7</sub> -Pt <sub>7</sub> | av. 2.828                                                                                       | av. 2.796         |
|                         | Pt <sub>7</sub> -Pt <sub>6</sub> | av. 2.820                                                                                       | av. 2.796         |
|                         | Pt <sub>6</sub> -Pt <sub>6</sub> | av. 2.846                                                                                       | av. 2.833         |
|                         | Pt <sub>6</sub> -Pt <sub>3</sub> | av. 2.835                                                                                       | av. 2.804         |
|                         | Pt <sub>3</sub> -Pt <sub>3</sub> | av. 2.856                                                                                       | av. 2.859         |
|                         | Pt-(μ <sub>4</sub> -Au)          | av. 2.832                                                                                       | av. 2.859         |
|                         | Pt-C <sub>t</sub>                | av. 1.882                                                                                       | av. 1.905         |
|                         | Pt-C <sub>b</sub>                | av. 2.030                                                                                       | av. 2.072         |
| Pt-( μ <sub>3</sub> -C) | av. 2.158                        | av. 2.187                                                                                       |                   |

**Table S17.** Relevant computed data for  $[\text{Pt}_{19}(\mu_3\text{-CO})(\mu\text{-CO})_5(\text{CO})_{18}\{\mu_4\text{-Au}_2(\text{PH}_3)_2\}_2]$ . Experimental bond distances are given for comparison.

|                         |                                  | $[\text{Pt}_{19}(\mu_3\text{-CO})(\mu\text{-CO})_5(\text{CO})_{18}\{\mu_4\text{-Au}_2(\text{PH}_3)_2\}_2]$ | Exp. <sup>8</sup> |
|-------------------------|----------------------------------|------------------------------------------------------------------------------------------------------------|-------------------|
| HOMO-LUMO gap           |                                  | 0.94 eV                                                                                                    |                   |
| Distances (Å)           | Pt <sub>3</sub> -Pt <sub>3</sub> | av. 2.823                                                                                                  | av. 2.808         |
|                         | Pt <sub>3</sub> -Pt <sub>7</sub> | av. 2.851                                                                                                  | av. 2.799         |
|                         | Pt <sub>7</sub> -Pt <sub>7</sub> | av. 2.842                                                                                                  | av. 2.795         |
|                         | Pt <sub>7</sub> -Pt <sub>6</sub> | av. 2.802                                                                                                  | av. 2.786         |
|                         | Pt <sub>6</sub> -Pt <sub>6</sub> | av. 2.859                                                                                                  | av. 2.823         |
|                         | Pt <sub>6</sub> -Pt <sub>3</sub> | av. 2.840                                                                                                  | av. 2.799         |
|                         | Pt <sub>3</sub> -Pt <sub>3</sub> | av. 2.835                                                                                                  | av. 2.823         |
|                         | Pt-(μ <sub>4</sub> -Au)          | av. 2.828                                                                                                  | av. 2.838         |
|                         | Pt-C <sub>t</sub>                | av. 1.886                                                                                                  | av. 1.885         |
|                         | Pt-C <sub>b</sub>                | av. 2.037                                                                                                  | av. 1.983         |
| Pt-( μ <sub>3</sub> -C) | av. 2.150                        | av. 2.146                                                                                                  |                   |

**Table S18.** Relevant computed data for  $[\text{Pt}_{40}(\mu\text{-CO})_{16}(\text{CO})_{24}]^{6-}$ . Experimental bond distances are given for comparison.

|               |                                  | $[\text{Pt}_{40}(\mu\text{-CO})_{16}(\text{CO})_{24}]^{6-}$ | Exp. <sup>9</sup> |
|---------------|----------------------------------|-------------------------------------------------------------|-------------------|
| HOMO-LUMO gap |                                  | 0.25 eV                                                     |                   |
| Distances (Å) | Pt <sub>8</sub>                  | av. 2.762                                                   | av. 2.745         |
|               | Pt <sub>8</sub> -Pt <sub>p</sub> | av. 2.773                                                   | av. 2.737         |
|               | Pt <sub>p</sub> -Pt <sub>p</sub> | av. 2.874                                                   | av. 2.883         |
|               | Pt <sub>p</sub> -C <sub>t</sub>  | av. 1.860                                                   | av. 1.851         |
|               | Pt <sub>p</sub> -C <sub>b</sub>  | av. 2.023                                                   | av. 1.978         |

**Table S19.** Relevant computed data for  $[\text{Pt}_{24}(\mu\text{-CO})_8(\text{CO})_{22}]^{2-}$ . Experimental bond distances are given for comparison.

|               |                                    | $[\text{Pt}_{24}(\mu\text{-CO})_8(\text{CO})_{22}]^{2-}$ | Exp. <sup>4</sup> |
|---------------|------------------------------------|----------------------------------------------------------|-------------------|
| HOMO-LUMO gap |                                    | 0.66 eV                                                  |                   |
| Distances (Å) | Pt <sub>10</sub> -Pt <sub>10</sub> | av. 2.826                                                | av. 2.803         |
|               | Pt <sub>10</sub> -Pt <sub>9</sub>  | av. 2.850                                                | av. 2.826         |
|               | Pt <sub>9</sub> -Pt <sub>9</sub>   | av. 2.819                                                | av. 2.797         |
|               | Pt <sub>9</sub> -Pt <sub>5</sub>   | av. 2.843                                                | av. 2.819         |
|               | Pt <sub>5</sub> -Pt <sub>5</sub>   | av. 2.824                                                | av. 2.796         |
|               | Pt-C <sub>t</sub>                  | av. 1.878                                                | av. 1.860         |
|               | Pt-C <sub>b</sub>                  | av. 2.033                                                | av. 1.996         |

**Table S20.** Relevant computed data for  $[\text{Pt}_{33}(\mu\text{-CO})_{10}(\text{CO})_{28}]^{2-}$ . Experimental bond distances are given for comparison.

|               |                                    | $[\text{Pt}_{33}(\mu\text{-CO})_{10}(\text{CO})_{28}]^{2-}$ | Exp. <sup>4</sup> |
|---------------|------------------------------------|-------------------------------------------------------------|-------------------|
| HOMO-LUMO gap |                                    | 0.49 eV                                                     |                   |
| Distances (Å) | Pt <sub>8</sub> -Pt <sub>8</sub>   | av. 2.858                                                   | av. 2.828         |
|               | Pt <sub>8</sub> -Pt <sub>12</sub>  | av. 2.838                                                   | av. 2.815         |
|               | Pt <sub>12</sub> -Pt <sub>12</sub> | av. 2.824                                                   | av. 2.827         |
|               | Pt <sub>12</sub> -Pt <sub>9</sub>  | av. 2.850                                                   | av. 2.818         |
|               | Pt <sub>9</sub> -Pt <sub>9</sub>   | av. 2.823                                                   | av. 2.796         |
|               | Pt <sub>9</sub> -Pt <sub>4</sub>   | av. 2.856                                                   | av. 2.829         |
|               | Pt <sub>4</sub> -Pt <sub>4</sub>   | av. 2.882                                                   | av. 2.837         |
|               | Pt-C <sub>t</sub>                  | av. 1.876                                                   | av. 1.857         |
|               | Pt-C <sub>b</sub>                  | av. 2.028                                                   | av. 1.996         |

## References

1. C. Femoni, M. C. Iapalucci, G. Longoni, S. Zacchini and S. Zarra, *J. Am. Chem. Soc.*, 2011, **133**, 2406–2409.
2. N. de Silva and L.F. Dahl, *Inorg. Chem.*, 2005, **44**, 9604–9606.
3. L. V. Nair, S. Hossain, S. Wakayama, S. Takagi, M. Yoshioka, J. Maekawa, A. Harasawa, B. Kumar, Y. Niihori, W. Kurashige and Y. Negishi, *J. Phys. Chem. C*, 2017, **121**, 11002–11009.
4. E. Cattabriga, I. Ciabatti, C. Femoni, M. C. Iapalucci, G. Longoni and S. Zacchini, *Inorg. Chim. Acta*, 2018, **470**, 238–249.
5. F. Gao, C. Li, B. T. Heaton, S. Zacchini, S. Zarra, G. Longoni and M. Garland, *Dalton Trans.*, 2011, **40**, 5002–5008.
6. D. M. Washecheck, E. J. Wucherer, L. F. Dahl, A. Ceriotti, G. Longoni, M. Manassero, M. Sansoni and P. Chini, *J. Am. Chem. Soc.*, 1979, **101**, 6110–6112.
7. A. Ceriotti, N. Masciocchi, P. Macchi and G. Longoni, *Angew. Chem. Int. Ed.*, 1999, **38**, 3724–3727.
8. A. Ceriotti, P. Macchi, A. Sironi, S. El Afefey, M. Dagheta, S. Fedi, F. Fabrizi de Biani and R. Della Pergola, *Inorg. Chem.*, 2013, **52**, 1960–1964.

9. E. Cattabriga, I. Ciabatti, C. Femoni, T. Funaioli, M. C. Iapalucci and S. Zacchini, *Inorg. Chem.*, 2016, **55**, 6068–6079.
